1 **Adaptation to heavy-metal contaminated environments**  
2 **proceeds via selection on pre-existing genetic variation.**

3  
4 **Kevin M. Wright 1\***, **Uffe Hellsten 2**, **Chenling Xu 3**, **Annie L. Jeong 4,5**, **Avinash**  
5 **Sreedasyam 6**, **Jarrold A. Chapman 2**, **Jeremy Schmutz 6**, **Graham Coop 3**, **Daniel**  
6 **S. Rokhsar 2,7**, **John H. Willis 4**

- 7  
8 1. Department of Organismic and Evolutionary Biology, Harvard University,  
9 Cambridge, MA, USA.  
10 2. Department of Energy Joint Genome Institute, Walnut Creek, CA 94598, USA.  
11 3. Department of Evolution and Ecology, University of California, Davis, CA,  
12 95616, USA.  
13 4. Department of Biology, Duke University, Durham, NC 27708, USA.  
14 5. University Program in Genetics and Genomics, Duke University Medical  
15 Center, Durham, North Carolina, USA  
16 6. Hudson Alpha Institute for Biotechnology, Huntsville, Alabama 35806, USA.  
17 7. Department of Molecular and Cell Biology, University of California, Berkeley,  
18 CA 94720, USA

19 \* Corresponding Author: [wright@fas.harvard.edu](mailto:wright@fas.harvard.edu)

20

20 **Across a species range, islands of stressful habitats impose similar selection**  
21 **pressures on isolated populations. It is as yet unclear, when populations**  
22 **respond to these selective pressures, the extent to which this results in**  
23 **convergent genetic evolution and whether convergence is due to independent**  
24 **mutations or shared ancestral variation. We address these questions**  
25 **investigating a classic example of adaptation by natural selection - the**  
26 **colonization of plant species to heavy metal contaminated soils. We use field-**  
27 **based reciprocal transplant experiments to demonstrate that mine alleles at a**  
28 **major copper tolerance QTL, *Tol1*, are strongly selected in the mine**  
29 **environment, but are neutral, or nearly so, in the off-mine environment. We**  
30 **assemble the genome of a mine adapted genotype and identify regions of this**  
31 **genome in tight genetic linkage to *Tol1*. We discover *Tol1* candidate genes that**  
32 **exhibit significantly large differences in expression between tolerant and non-**  
33 **tolerant genotypes or in allele frequency between mine/off-mine population**  
34 **pairs. We identify a single gene, a multicopper oxidase, which exhibits *both***  
35 **large differences in expression and allele frequency. Furthermore, patterns of**  
36 **genetic variation at the five loci with the greatest difference in allele**  
37 **frequency between populations, including the multicopper oxidase, are**  
38 **consistent with selection acting upon beneficial haplotypes that predates the**  
39 **existence of the copper mine habitat. We estimate the age of selected *Tol1***  
40 **haplotype to be at least 1700 years old and was at a frequency of 0.4-0.6% in**  
41 **the ancestral population when mining was initiated 150 years ago. These**  
42 **results suggest that adaptation to the mine habitat routinely occurs via**  
43 **selection on ancestral variation, rather than independent *de-novo* mutations**  
44 **or migration between populations.**

45  
46 The most spectacular demonstrations of evolution often involve independent  
47 populations repeatedly evolving similar traits in response to similar environmental  
48 pressures (Endler 1977; Joron and Mallet 1998; Schluter, 2000). Convergent  
49 evolution of similar phenotypes suggests convergence in genotype, as may occur  
50 when selection operates on the same ancestral allele in independent populations or  
51 species (Colosimo *et al.* 2005; The Heliconius Genome Consortium, 2012).  
52 Additionally, there are multiple instances of the similar phenotypes evolving via  
53 independent genetic mutations at the same locus (Tishkoff *et al.* 2007, Karasov *et al.*  
54 2010). When evolution occurs via selection on pre-existing genetic variation,  
55 adaptation to novel environments will proceed quite quickly. Conversely, when  
56 evolution proceeds via independent genetic mutations, adaptation will be limited by  
57 the waiting time for beneficial mutations to occur and go to high frequency. In order  
58 to understand the circumstances under which either of these evolutionary scenarios  
59 is likely to occur, and make predictions about how species will respond to rapid  
60 environmental changes such as global climate change, we investigate the genomic  
61 basis of a classic example of convergent phenotypic evolution.

62  
63 Investigations into the repeated colonization of stressful soil environments by  
64 plants species have a long history in the development of evolutionary biology  
65 (Kruckeberg 1951; Turner 1969; Antonovics *et al.* 1971; Macnair 1987). With the

66 initiation of the first, and still on-going, field experiments at Park Grass, UK,  
67 scientists demonstrated that soil nutrient levels and pH impose strong selection on  
68 the local plant communities causing some plant species to rapidly evolve tolerance,  
69 whereas other species, despite ample migration opportunities, never colonize these  
70 stressful habitats (Brenchley 1958). This result has been replicated in investigations  
71 of plants colonizing heavy metal contaminated soils (Walley *et al.* 1974, Bradshaw  
72 1984, Symeonidis *et al.* 1985; Al-Hiyaly *et al.* 1990, 1993). Interestingly, the only  
73 species to colonize contaminated soils also have tolerant individuals in populations  
74 unexposed to soil contamination. Whereas species that did not evolved tolerance,  
75 lack tolerant individuals in unexposed populations (*summarized in* Bradshaw,  
76 1991). Given these results, Bradshaw concluded that tolerant species possessed the  
77 necessary genetic variation in ancestral populations, and species which remain non-  
78 tolerant lack the necessary genetic variation to adapt to novel environmental  
79 pressures (1991). However these results do not eliminate the possibility that  
80 tolerance was absent in the ancestral population and spread, by migration, to  
81 uncontaminated sites following adaptation. To distinguish between these two  
82 hypotheses, we need additional evidence on the source of adaptive genetic variation  
83 in natural populations.

84  
85 Here, we investigate the recent and repeated adaptation of the annual wildflower,  
86 *Mimulus guttatus*, to copper contaminated sites near Copperopolis, CA (Macnair *et*  
87 *al.* 1993). Contaminated sites have 10-100 fold increase in the concentration of  
88 copper in the soil compared to uncontaminated sites (Allan and Sheppard 1971;  
89 Macnair *et al.* 1993; S. Table 1). Copper mining in this region of the Sierra Nevada  
90 foothills started in 1861 (Aubury 1908). Mine populations are located in close  
91 geographic proximity, within 40km of each other, and *M. guttatus* is very common in  
92 uncontaminated soils adjacent to mine sites (Allan and Sheppard 1973; Macnair *et*  
93 *al.* 1993). Copper tolerance is nearly fixed at four mine populations (99.77%, N  
94 =2796); at intermediate frequency (56.0%; N=1121) at eleven sites, mostly located  
95 within one mile of contaminated soil, and at low frequency (2.2%; N=1056;) in 11  
96 populations located 1-10 miles from contaminated soil (Macnair *et al.* 1993). This  
97 suggests that the copper tolerance phenotype, measured as root growth in a  
98 hydroponic solution, is under strong selection in contaminated habitats. It remains  
99 to be determined whether each mine was colonized independently and whether the  
100 low frequency of tolerance at uncontaminated sites represents ancestral variation  
101 or back migration from the mines. Previously, we identified a single large effect QTL  
102 for copper tolerance, *Tol1*, in line from the Copperopolis mine population (Wright *et*  
103 *al.* 2013). It is unknown whether this same locus contributes to copper tolerance in  
104 other mine adapted populations. We use field based transplant experiments,  
105 population genomic sequencing, and coalescence modeling to address three key  
106 questions: Does *Tol1* affect fitness in mine habitat, and if so, is it the primary  
107 determinate of survival in this habitat? Did convergent phenotypic evolution in  
108 independent mine populations occur via convergent genetic evolution? Did mine  
109 alleles at the candidate adaptation loci evolve from new beneficial mutations or via  
110 selection on pre-existing standing variation?

111

## 112 ***Tol1* affects fitness in copper mine habitat**

113 We directly measured whether the mine and off-mine genotypes are locally adapted  
114 to their respective habitats using a reciprocal transplant experiment across multiple  
115 years (S. Figure 1). We found that plants from the mine population have greater  
116 fitness than off-mine genotypes in mine habitat, supporting the hypothesis of strong  
117 selection in this environment (Figure 1; S. Table 2-9). In the off-mine habitat, mine  
118 genotypes were also slightly favored compared to off-mine genotypes (Figure 1; S.  
119 Table 2-9). This suggests that high fitness in the mine environment does not cause a  
120 detectable trade-off in fitness in the off-mine environment. In order to measure  
121 whether the copper tolerance locus affects fitness, we conducted a reciprocal  
122 transplant experiment with introgression lines possessing alternate alleles at *Tol1*.  
123 We constructed introgression lines by reciprocally backcrossing lines with mine and  
124 off-mine alleles at the tolerance locus (*Tol1*<sub>CC</sub> or *Tol1*<sub>MM</sub>) to mine (CCC<sub>BC</sub>) and off-  
125 mine (MED<sub>BC</sub>) genotypes (S. Figure 2). In the off-mine habitat, we found no  
126 significant effect of the *Tol1* locus in our CCC<sub>BC</sub> introgression lines, (95% CI: 0.14, -  
127 0.36,  $p = 0.68$ , S. Table 6 ) which suggests that tolerant alleles at *Tol1* are neutral (or  
128 only weakly selected) in off-mine populations. Conversely, we found that mine  
129 alleles at *Tol1* greatly increases the probability of survival to flowering in the mine  
130 habitat (Figure 1; S. Table 2). The strength of selection ( $s$ ) on *Tol1*, defined as the  
131 relative fitness of each allele, was significantly stronger in the off-mine genomic  
132 background (MED<sub>BC</sub>  $s=0.69$ ) compared to the mine genomic background (CCC<sub>BC</sub>  
133  $s=0.30$ ). Additionally, the difference in fitness between parental lines, ( $s=0.90$ ; S.  
134 Table 2) is greater than the fitness effect of *Tol1*. These two results support the  
135 hypothesis that additional loci contribute to fitness in the mine habitat. Our finding  
136 that the *Tol1* mine allele does not impose a measureable fitness cost in the off-mine  
137 habitat is consistent with either back-migration or ancestral variation as possible  
138 scenarios explaining the low frequency of copper tolerant plants in this  
139 environment. To distinguish between these two scenarios we need to measure  
140 segregating variants at *Tol1* in mine and off-mine populations.

141

## 142 **Targeted assembly of *Tol1* region**

143 To accurately measure genetic variation at *Tol1*, we need to first improve the  
144 assembly of this region. *Tol1* is located in a poorly assembled pericentromeric  
145 region of linkage group 9 in the *M guttatus* reference assembly, notably  
146 characterized by large amounts repetitive DNA and low recombination rates  
147 (Wright *et al.* 2013). We sought to map all genomic scaffolds linked to *Tol1* by  
148 resequencing plants derived from our original Near Isogenic Line (NIL) mapping  
149 population (Wright *et al.* 2013). To accomplish this, we sequenced two pools of  
150 plants each composed of 100 plants homozygous for either tolerant (NIL\_*Tol1*<sub>TT</sub>) or  
151 nontolerant (NIL\_*Tol1*<sub>NTNT</sub>) alleles at the genetic marker, *Sc84\_37kb*, located 0.32 cM  
152 from *Tol1* (Wright *et al.* 2013). We reason that that scaffolds in this region should,  
153 except in the case of a rare recombination event, be fixed for different haplotypes in  
154 the NIL\_*Tol1*<sub>TT</sub> and NIL\_*Tol1*<sub>NTNT</sub> pools. We estimate the recombination distance  
155 between genomic scaffolds and the *Sc84\_37kb* marker as the frequency of SNPs in  
156 the two pools to used to define the two pools (S. Text). We identified eight scaffolds,  
157 comprising 4.9 Mb, within a somewhat enlarged search space of 0.80 cM (S. Figure



158 3; S. Table 10). We also identified small portions of other scaffolds that are in tight  
159 linkage to *Tol1* (data not shown), suggesting problems with the v1.1 reference  
160 assembly and/or translocations between the reference and mapping lines. To  
161 address these assembly issues we sequenced a Copperopolis inbred line, CCC52, to  
162 220X coverage and constructed a *de novo* genome assembly (S. Text, S. Table 11).  
163 We repeated our mapping effort using this *de novo* assembly and identified 53  
164 CCC52 scaffolds, totaling 3.1Mb in length, within 0.80 cM of the *Sc84\_37kb* marker  
165 (S. Text, S. Table 12). While most of the scaffolds are homologous to reference  
166 assembly *Tol1* linked scaffolds, eight of them are unique to the CCC52 assembly.  
167 Using this improved assembly, we sought to identify genes that exhibit significant  
168 differences in expression between NIL\_*Tol1*<sub>TT</sub> and NIL\_*Tol1*<sub>NTNT</sub> lines.

169

### 170 **Differential expression of *Tol1* link genes**

171 We measured gene expression in the NIL\_*Tol1*<sub>TT</sub> and NIL\_*Tol1*<sub>NTNT</sub> lines grown in a  
172 full-strength Hoaglands solution and Hoaglands enriched with 1.25 ppm CuSO<sub>4</sub>. We  
173 extracted mRNA from root tissue, sequenced each mRNA library to 140X coverage,  
174 and aligned all reads to a *de novo* transcriptome assembly (S. Text). We find that the  
175 majority of differentially expressed genes are due to allelic variation between the  
176 NIL\_*Tol1*<sub>TT</sub> and NIL\_*Tol1*<sub>NTNT</sub> lines, the copper treatment had negligible effect on  
177 gene expression. We identified 277 genes that are differentially expressed (DE)  
178 (Benjamini & Hockberg adjusted p-value < 0.1 and log<sub>2</sub> fold change > 1.0) between  
179 lines in either treatment, 37 of these genes are located on the 53 *Tol1* linked  
180 scaffolds (S. Figure 4, S. Table 13). Some *Tol1* link DE genes - including a heavy  
181 metal ion transporter, a potassium ion transporter, and a multicopper oxidase -  
182 function to maintain intracellular ion homeostasis and may underlie the copper  
183 tolerance phenotype. Next, we sought to determine whether *Tol1* linked DE genes  
184 exhibit large differences in allele frequency in mine/off-mine population  
185 comparison.

186

### 187 **Identification of candidate adaptation loci at *Tol1***

188 We sought to identify loci at *Tol1* that may underlie adaptation to the copper mine  
189 environment by measuring the genetic variation within and between two mine and  
190 two offmine populations. In a classic hard selective sweep, selection drives a single  
191 new beneficial mutation to near fixation, causing linked sites to hitchhike to high  
192 frequency, leading to a local reduction in genetic variation and large differences in  
193 allele frequency between the ancestral and derived populations (Maynard Smith &  
194 Haigh 1974, Barton 2000, Berg and Coop 2015). Alternatively, selection on pre-  
195 existing adaptive variants, which reside on multiple haplotypes, is predicted to  
196 produce a much smaller change in allele frequency at surrounding sites because no  
197 single haplotype goes to fixation (Innan and Kim 2004, 2008; Prezeworski *et al.*  
198 2005). This event is sometimes termed a soft selective sweep (Messer and Petrov  
199 2013). By comparing independent populations that have both adapted to similar  
200 environments, we can distinguish between selection on newly derived beneficial  
201 mutations or shared ancestral variation.

202

203 We sequenced pooled DNA from 20-31 natural isolates from two mine and two off-  
204 mine populations to 34-72X genome-wide coverage (S. Text, S. Table 1, S. Figure 5).  
205 Genome wide nucleotide diversity is similar across all populations, ( $\pi = 0.0254 -$   
206  $0.0268$  ; S. Table 14). Genome-wide estimates of genetic differentiation between  
207 populations, measured with  $F_{st}$  and the  $G$  statistic (accounts for difference in  
208 coverage among sites and populations, S. Text) are higher between mine/off-mine  
209 compared to off-mine/off-mine population comparisons ( $F_{st} M/OM = 0.07-0.14$ ;  $F_{st}$   
210  $OM/OM = 0.02$ ; S. Table 15). Elevated genome-wide estimates of differentiation  
211 between mine/off-mine populations is caused by a few, large effect genomic regions  
212 (ie. S. Figure 6) whereas the majority of the genome shows little differentiation.  
213 These results suggest that the mine populations did not undergo a strong bottleneck  
214 and/or gene flow readily occurs between populations in contrasting habitats.

215  
216 We identified genomic regions with elevated difference in allele frequency at *Tol1*,  
217 as well as at other sites across the genome. Differentiation at *Tol1* is not elevated  
218 across all scaffolds in tight linkage to this locus (S. Figure 7, 8), as would be expected  
219 from a single hard selective sweep (S. Text), instead we find multiple loci with  
220 nearly fixed differences in allele frequency between mine/off-mine populations  
221 surrounded by large regions of shared genetic variation. We focus on loci that  
222 exceed the 0.5% genome-wide threshold of allelic differentiation in both mine/off-  
223 mine population comparisons (allelic differentiation is measured using the  $G$   
224 statistic in 500bp bins, S. Text). We identify five distinct candidate adaptation loci,  
225 harboring seven genes, within the 53 *Tol1* link CCC52 scaffolds (S. Table 16). The  
226 signal of differentiation at these loci is relatively narrow (<20kb) with no significant  
227 differentiation at physically adjacent regions. To identify which, if any, of these  
228 genes maybe a *Tol1* candidate, we compared these genes to the 37 differential  
229 expression genes from the RNA-seq experiment. We find, one gene, a multicopper  
230 oxidase (MCO) is significantly differentiated in both experiments. MCO is located on  
231 a small scaffold (*s47895* - 1.7kb) that is absent from the reference genome.  
232 Furthermore, we find that mine populations exhibit a 6X fold enrichment of aligned  
233 reads at MCO (S. Table 17), suggesting a recent tandem duplication of this gene is  
234 responsible for the 12X increase in expression observed in copper tolerant lines (S.  
235 Table 13). This gene represents an interesting *Tol1* candidate, but additional  
236 functional studies are required to determine whether it is responsible for the copper  
237 tolerance phenotype. Building upon the results from our transplant experiment, that  
238 *Tol1* accounts for some but not all of the variation in fitness in the mine  
239 environment (Figure 1), we next sought to identify additional loci with a population  
240 genetic signature of selection.

#### 241 242 **Genome-wide survey of candidate adaptation loci**

243 We identified multiple genomic regions with elevated levels of differentiation  
244 between mine and offmine populations. As with *Tol1*, we focused on candidate  
245 adaptation loci that exceed the 0.5% genome-wide  $G$  statistic threshold in mine/off-  
246 mine population comparisons. Some loci are unique to one mine/off-mine  
247 population comparison (S. Table 18, 19), however, loci with the largest difference in  
248 allele frequency, 0.5% and 0.1% outliers, are much more likely to be shared

249 between the mine/off-mine population comparisons than would be expected from  
250 random chance (S. Table 20; S. Figure 9). We rank the loci by their degree  
251 differentiation (the quantity of physically adjacent 0.5% outlier bins) in both  
252 mine/off-mine population comparisons and find that *Tol1*, although it has a large  
253 effect on fitness, ranks as the fifth most differentiated region of the genome (Table  
254 1). The identify of the top candidate adaptation loci in our screen are largely robust  
255 to changes in the genome-wide *G* statistic threshold (1%, 0.5%, 0.1%; S. Table 21),  
256 clustering of adjacent outlier bins (5kb, 10kb, 100kb; S. Table 22), the minimum  
257 number of SNPs per bin and measures of population differentiation (5 or 10 SNPs; *G*  
258 or *F<sub>st</sub>*; S. Table 23). Nearly all candidate adaptation loci are restricted to single genes  
259 which encode proteins that function to maintain intracellular ion homeostasis  
260 (copper ion transporter, iron-zinc ion transporter, transmembrane ferric reductase,  
261 and potassium ion transporter; Table 1) and, in some cases, they have been  
262 implicated in heavy-metal tolerance (ie. Hanikenne *et al.* 2008 ; Grennan *et al.*  
263 2009). The young age of mine populations and narrow interval of divergence  
264 (<30kb) suggests that beneficial variants pre-date the establishment of mine  
265 populations.

### 266 267 **Selection on pre-existing genetic variation**

268 The narrow interval of genetic differentiation at each candidate adaptation locus is  
269 inconsistent with expectations from a hard selective sweep. Given the intense  
270 selection on *Tol1* (*s*=0.69, Figure 1), a hard selective sweep would cause the mine  
271 allele to reach near fixation in ~20 generations and reduce genetic diversity by  
272 >50% for ~3Mb from the selected site (S. Text). In contrast, we observe that for *Tol1*  
273 outlier loci, heterozygosity recovers to 50% of background within a maximum of  
274 20kb (S. Table 22). This quick recovery, despite strong selection, strongly suggests  
275 that the selected allele at *Tol1* was segregating in the ancestral population prior to  
276 the establishment of the mine populations. If this is true, we predict that each mine  
277 population would share the same haplotype at the candidate loci. In order to assess  
278 this hypothesis for the *Tol1* region, and all other candidate adaptation loci, we  
279 measured genetic differentiation between mine populations.

280  
281 We find that three loci in tight linkage to *Tol1* and four additional unlinked  
282 candidate adaptation loci exhibit regions of very low genetic differentiation between  
283 mine populations (Table 2; i.e. Figure 2, S. Figure 9-15). This is inconsistent with  
284 independent sweeps of new mutations, but rather with selection on shared standing  
285 variation. Mine populations share the same *core haplotype* at these loci (extending  
286 from 1-18kb; Table 2) and outside this core, genetic differentiation between mine  
287 populations rises dramatically to levels comparable to differentiation between mine  
288 and off-mine populations (Figure 2). This peak-valley-peak pattern is additional  
289 evidence that the *core haplotype* was present in the ancestral population and  
290 recombined onto multiple genomic backgrounds prior to the establishment of the  
291 copper mines (Roesti *et al.* 2014). How old must the *core haplotypes* be to have an  
292 opportunity to recombine onto different genomic backgrounds prior to the  
293 initiation of mining in the region?

294

## 295 **Age of core haplotypes**

296 We estimate the age of the *core haplotypes* using the rate at which genetic diversity  
297 around the mine allele recovers to background levels (S. Text). We find that all *core*  
298 *haplotypes* predate the establishment of the copper mines (Table 2). Not  
299 surprisingly, the locus with the strongest signature of selection, MET, has the  
300 youngest *core haplotype* (639 generations), but even this haplotype existed in the  
301 ancestral Copperopolis population long before the establishment of the mine (150  
302 years; Table 2). In contrast to the four unlinked *core haplotype* regions, we find  
303 three tightly linked *core haplotypes* at *Tol1*. This suggests these haplotypes were in  
304 linkage disequilibrium (LD) in the ancestral population, a hypothesis consistent  
305 with the result that each scaffold maps to <0.05 cM of the same position (S. Table  
306 12), and LD was maintained as they rose to high frequency in each mine population.  
307 We estimate the age of the *core haplotypes* at the three *Tol1* linked genes to predate  
308 the establishment of the copper mines by hundreds-thousands of years (Table 2).  
309 The CDK and PUM haplotypes have been present in the ancestral Copperopolis  
310 population for 1700-2700 generations, whereas the MCO haplotype is much older  
311 (12,500 generations). Using the age of these haplotypes and the strength of selection  
312 on *Tol1*, we calculate that the CDK and PUM haplotypes were at 0.4-0.6% and the  
313 MCO at 4.5% frequency when the copper mines were first established (S. Table 24).  
314 These values are inflated for MCO because it is on a small scaffold with few  
315 informative SNPs (S. Figure 15), thus we consider the CDK and PUM estimates to  
316 better reflect the age and frequency of the selected allele at *Tol1*.

317

## 318 **Conclusion**

319 In this study, we investigate a classic example of rapid adaptation, colonization of  
320 heavy metal contaminated environments. We investigate the genetic control of a  
321 major copper tolerance QTL, *Tol1*. This locus has a significant effect on fitness in the  
322 mine environment ( $s = 0.69$ ). We improve the assembly of the pericentromeric  
323 region harboring *Tol1*. Next we use whole genome RNA expression measurements  
324 and population genomic sequencing to identify candidate genes at this locus. We  
325 identify a single gene, a multicopper oxidase, with large differences in expression  
326 between tolerant and nontolerant lines and allele frequency between mine and off-  
327 mine populations. Interestingly, three tightly linked genes at *Tol1*, including MCO,  
328 possess *core haplotypes* that are strongly differentiated from the off-mine  
329 populations and highly similar between mine populations. This pattern suggests  
330 these *core haplotypes* predates the establishment of the mine populations. We  
331 develop a novel method to estimate the age of these haplotypes and find that they  
332 predate the establishment of the copper mines by 1000s of generations.  
333 Furthermore, we estimate the frequency of this haplotype in the ancestral  
334 population at the onset of mining (< 1%) is consistent with estimates of the  
335 frequency of tolerant plants in current populations inhabiting uncontaminated sites  
336 (Macnair *et al.* 1993). Looking throughout the genome we find that the top four  
337 candidate adaptation loci exhibit a *core haplotype* pattern similar to what we  
338 observe at *Tol1*. The function of the majority of these genes, to maintain intracellular  
339 ion homeostasis, suggests they contributed to adaptation in these copper  
340 contaminated environments. This work combining field-based estimates of

341 selection, population genomics, and theoretical analyses provides thorough support  
342 for the classic hypothesis that rapid adaptation in natural populations primarily  
343 proceeds via selection on standing genetic variation (Bradshaw 1991).  
344  
345



345 **Figures**

346

347 **Figure 1 (A)** Mean probability of survival to flowering for all genotypes in mine  
348 plots in 2012 reciprocal transplant experiment (error bars = standard deviation).  
349 The probability a plant survives to flower, and the p-values testing whether there is  
350 a significant effect of genotype, is calculated from the predicted values using a  
351 logistic regression. The different genotypes are: parental mine, parental off-mine, F1  
352 hybrid, and backcross lines (BC). Backcross lines are homozygous for Copperopolis  
353 mine allele at *Tol1* (red bars) or MED off-mine allele at *Tol1*, blue bars. **(B)** Mine  
354 plot, replicate 1. **(C)** Survival to flowering for all genotypes in offmine plots in 2012  
355 reciprocal transplant experiment. Due to low germination, we have no data for the  
356 BC MED with off-mine allele at *Tol1*. **(D)** Off-mine plot, replicate 1.

357

358 **Figure 2** Genetic differentiation at top ranked candidate adaptation locus on  
359 *Scaffold8*. **(A)** Genetic differentiation measured with G statistic for individual SNPs .  
360 Arrows depict annotated genes from *M. guttatus* genome V1.1. – Black arrows are  
361 genes within *core haplotype (B)* ratio:  $\pi_{\text{Mine}} / \pi_{\text{Off-mine}}$  measured in 500bp windows.  
362 Orange dots/lines: Mine1 vs. Off-mine1. Blue dots/lines: Mine2 vs. Off-mine2. Green  
363 dots in **(A)**: Mine1 vs. Mine2. Green line in **(B)** ratio of pairwise  $\pi$ :  $\pi_{\text{Mine1+Mine2}} / \pi_{\text{Mine-}}$   
364  $\pi_{\text{Off-mine}}$ . Grey dashed line indicates genomic intervals with no SNP data.

365

366 **Supplemental Figure 1** Local adaptation of parental genotypes in the mine habitat.  
367 A. Experimental plot 1 at the copper mine, soil Cu is 142ppm. B. Experimental off-  
368 mine plot 1, soil Cu is 12.9ppm. C. Copperopolis parental line flowering on May12,  
369 2012. D. Probability of survival to flowering of parental genotypes in two years of  
370 reciprocal transplant experiments. Mine genotypes orange=2007; red=2012. Off-  
371 mine genotypes: purple=2007; blue=2012. E. Map of experimental plots at Napoleon  
372 Mine, 15 km from Copperopolis, CA. Orange shaded region is approximate outline of  
373 mine. Orange diamonds are two mine plots, and blue triangles are two off-mine  
374 plots.

375

376 **Supplemental Figure 2** Generation of outbred BC lines of known genotype at *Tol1*  
377 locus. Backcrossing to Copperopolis parental lines, CCC, proceeded for four  
378 generations and backcross to Off-mine parental line, MED, proceeded for one  
379 generation. Afterwards heterozygous *Tol1* plants were identified with *Tol1* linked  
380 markers and selfed to produce plants homozygous for alternate alleles at *Tol1*.  
381 Independent backcross lines were then intercrossed to produce outbred plants of  
382 known genotype at *Tol1* locus.

383

384 **Supplemental Figure 3** Assembly of *Tol1* region.

385 Plot of the recombination distance between a focal gene and the *Sc84\_37kb* marker  
386 (indicated with blue arrow). Recombination distance estimated using all  
387 informative SNPs within focal gene (S. Text). *Tol1* linkage threshold (recombination  
388 distance of 0.008, or 0.8cM) is denoted with blue line. Black arrows at top indicate  
389 approximate location of v1.1 scaffolds.

390

391 **Supplemental Figure 4** Differentially expressed transcripts in tolerant and non-  
392 tolerant lines.  
393 Plot of log<sub>2</sub> fold changes over mean expression. Blue horizontal lines represent fold  
394 change in expression of 1.0. Red dots indicate transcripts that have adjusted p-value  
395 less than 0.1. Triangles indicate transcripts that exceed 10 or -10 log<sub>2</sub> fold change in  
396 expression. **A.** Difference in expression between NIL\_*Tol1*<sub>TT</sub> and NIL\_*Tol1*<sub>NTNT</sub> lines  
397 in Hoaglands + Cu treatment. We identified 93 and 107 transcripts down- and up-  
398 regulated respectively at an FDR of 0.1. **B.** Hoaglands treatment. We identified 119  
399 and 105 transcripts to be down- and up-regulated respectively at an FDR of 0.1.

400  
401  
402 **Supplemental Figure 5** Map of Copperopolis, Calaverous Cty, CA, USA.  
403 Red circles are mine populations and blue circles denote off-mine populations.  
404 Population key: CCC – Copperopolis mine; MCN - McNulty mine; OM1 –Off-Mine1/  
405 O’Byrnes Ferry Rd.; and OM2 Off-mine2/ Stage Coach Rd.

406  
407 **Supplemental Figure 6** Scaffold wide plots of allelic divergence between  
408 Copperopolis and Off-mine 1.  
409 Plot of rank *G* statistic between Copperopolis and Off-mine 1 for scaffold 8. Each dot  
410 is 500bp bin - minimum 10 SNPs per bin- sliding window step size of 100bp. Black  
411 line is 0.5% genome wide threshold used to identify outlier bins.

412  
413  
414 **Supplemental Figure 7** Genetic Differentiation at *Tol1* Linked Reference Genome  
415 Scaffolds  
416 Order of scaffolds (reference genome v1.1) is same for S. Figure 3. Scaffold wide  
417 plots of allelic divergence, genome wide rank *G* statistic, between (A) Copperopolis /  
418 Off-mine 1, orange dots and (B) McNulty Mine / Off-mine 2, blue dots. Each dot is  
419 500bp bin - minimum 10 SNPs per bin- sliding window step size of 100bp. Black line  
420 is 0.5% genome wide threshold used to identify outlier bins.

421  
422 **Supplemental Figure 8** Genetic Differentiation at *Tol1* Linked CCC52 Genome  
423 Scaffolds.  
424 Population comparisons same as presented in S. Figure 7. Scaffolds are in numerical  
425 order from 1-53 according to name ID in S Table 12.

426  
427 **Supplemental Figure 9** Plot of allelic divergence between Copperopolis-Off-mine1  
428 and McNulty-Off-mine2.  
429 Candidate adaptation loci exceed 0.1% (dark blue), 0.5% (blue), 1.0% (light blue)  
430 rank *G* statistic threshold in both mine/off-mine comparisons. Allelic divergence  
431 measured as average *G* score for SNPs within 500bp window, each dot is a single  
432 500bp bin with data for both population comparisons.

433  
434 **Supplemental Figure 10** Allelic divergence for candidate region: rank 2, scaffolds  
435 148 and 198. These two scaffolds are adjacent in *M. guttatus* genome V. 2.0. (A)  
436 Genetic differentiation measured with *G* statistic for individual SNPs . Arrows depict

437 annotated genes from *M. guttatus* genome V1.1. – Black arrows are genes within  
438 *core haplotype (B)* ratio:  $\pi_{\text{Mine}} / \pi_{\text{Off-mine}}$  measured in 500bp windows. Orange  
439 dots/lines: Mine1 vs. Off-mine1. Blue dots/lines: Mine2 vs. Off-mine2. Green dots in  
440 **(A)**: Mine1 vs. Mine2. Green line in **(B)** ratio of pairwise  $\pi$ :  $\pi_{\text{Mine1+Mine2}} / \pi_{\text{Mine-Off-mine}}$ .  
441 Grey dashed line indicates genomic intervals with no SNP data.

442

443 **Supplemental Figure 11** Allelic divergence for candidate region: rank 3, scaffold 4.  
444 Figure details are provided in legend of S Figure 9.

445

446 **Supplemental Figure 12** Allelic divergence for candidate region: rank 4, scaffold 1.  
447 Figure details are provided in legend of S Figure 9.

448

449 **Supplemental Figure 13** Allelic divergence for *Tol1* link candidate locus CDK,  
450 scaffold 7467, CCC52 genome. Figure details are provided in legend of S Figure 9.

451

452 **Supplemental Figure 14** Allelic divergence for *Tol1* link candidate locus PUM,  
453 scaffold 10201, CCC52 genome. Figure details are provided in legend of S Figure 9.

454

455 **Supplemental Figure 15** Allelic divergence for *Tol1* link candidate locus MCO,  
456 scaffold 47895, CCC52 genome. Figure details are provided in legend of S Figure 9.

457

457

458

459 **Tables**

460

461 **Table 1. Top ranked candidate adaptation loci**

| Rank | Scaffold    | Length (kb) | N - Genes | N - Bins Exceed 0.5% | N - SNPs Fixed Diff. | Locus ID | Annotation                                            |
|------|-------------|-------------|-----------|----------------------|----------------------|----------|-------------------------------------------------------|
| 1    | 8           | 32.9        | 10        | 97                   | 70\65                | MET      | Cytochrome P450; Methytransferase; Protease Inhibitor |
| 2    | 148/<br>198 | 24.1        | 2         | 39                   | 0\32                 | FER      | Transmembrane Ferric Reductase                        |
| 3    | 4           | 7.7         | 2         | 25                   | 0\0                  | ZNC      | Zinc/Iron Ion Transporter                             |
| 4    | 1           | 8.1         | 1         | 19                   | 0\5                  | COP      | Copper Ion Transporter                                |
| 5A   | 84          | 1.8         | 1         | 11                   | 0\0                  | MND      | <b>Tol1 Link</b> - Mandelate Racemase                 |
| 5B   | 84          | 5.8         | 1         | 8                    | 3\0                  | CDK      | <b>Tol1 Link</b> - Cyclin Dependent Kinase            |
| 6    | 44          | 2.5         | 1         | 9                    | 0\0                  | SHD      | Protein Binding, SH3 domain                           |
| 7    | 80          | 6.2         | 1         | 6                    | 0\0                  | DUF      | Unknown Function                                      |
| 8    | 115         | 0.9         | 1         | 5                    | 0\0                  | KIT      | Potassium Ion Transporter                             |
| 9    | 47          | 2.1         | 0         | 5                    | 0\0                  | -        | Intergenic                                            |
| 10   | 51          | 0.8         | 1         | 4                    | 0\0                  | HSP      | Heat Shock Protein, HSP90.                            |

462

463

464

465 Candidate adaptation loci are composed on 500bp bins that exceed 0.5% rank G  
466 statistic threshold in both mine/off-mine population comparisons. Outlier bins are  
467 grouped together using the 10kb clustering algorithm. Loci are ranked by the  
468 number of outlier bins at a locus. The physical length of a candidate locus is defined  
469 by the region of overlap between both mine-off-mine population comparisons. The  
470 FER locus spans two adjacent scaffolds: 148 and 198. The number of SNPs with fixed  
471 differences is presented for CCC vs. Off-mine1 \ MCN vs. Off-mine2 comparisons.  
472 Gene annotation from *M. guttatus* genome v1.1, phytozome.net. Annotation of loci  
473 that span multiple genes is restricted to genes with strongest signal of  
474 differentiation.

475

476

477

478

478 **Table 2 –Age of core haplotypes at candidate adaptation loci.**  
 479

| Locus ID                        | Core Haplotype |             |            | Coalescence Time |       |         |         | Annotation                                                           |
|---------------------------------|----------------|-------------|------------|------------------|-------|---------|---------|----------------------------------------------------------------------|
|                                 | Scaffold       | Length (kb) | Num. Genes | CCC              | MCN   | CCC/OM1 | MCN/OM2 |                                                                      |
| MET                             | 8              | 19.6        | 4          | 639              | 1191  | 1901    | 5699    | Cytochrome P450; Methytransferase; Protease Inhibitor; Unknown Func. |
| FER                             | 148/19<br>8    | 7.06        | 1          | 1533             | 2022  | 2285    | 1725    | Transmembrane Ferric Reductase                                       |
| ZNC                             | 4              | 2.4         | 1          | 17191            | 960   | 1622    | 1537    | Zinc/Iron Ion Transporter                                            |
| COP                             | 1              | 1.27        | 1          | 5062             | 3119  | 3956    | 3931    | Copper Ion Transporter                                               |
| <b><i>Tol1</i> Linked Genes</b> |                |             |            |                  |       |         |         |                                                                      |
| CDK                             | 7467*          | 1.26        | 1          | 1768             | 7840  | 19121   | 15778   | Cyclin Dependent Kinase                                              |
| PUM                             | 10201*         | 8.51        | 1          | 2789             | 10162 | 19264   | 23900   | Pumilio-family, RNA binding                                          |
| MCO                             | 47895*         | 1.06        | 1          | 12543            | 90664 | 340560  | 56920   | Multicopper oxidase                                                  |

480  
 481  
 482  
 483  
 484  
 485  
 486  
 487  
 488  
 489  
 490

The length and age of the core haplotypes are estimated by modeling the rate at which  $\pi_{M1-M2}$  (pairwise  $\pi$  between mine populations ) increases with distance from the selected site using the program, MSSEL, see supplemental text for additional details. The length of the core haplotype is estimated using equation 1 in S. Text. Coalescence time is presented in generations for within population (CCC; MCN) and between population (CCC/OM1; MCN/OM2) analyses. \*Scaffold ID corresponds to CCC52 de novo assembly.



490

491 **References**

- 492 Al-Hiyaly, S. A. K., McNeilly, T., & Bradshaw, A. D. (1990). The Effect of Zinc  
493 Contamination from Electricity Pylons. Contrasting Patterns of Evolution in Five  
494 Grass Species. *New Phytologist*, 114(2), 183–190.
- 495
- 496 Al-Hiyaly, S. A. K., McNeilly, T., Bradshaw, A. D., & Mortimer, A. M. (1993). The effect  
497 of zinc contamination from electricity pylons. Genetic constraints on selection for  
498 zinc tolerance. *Heredity*, 70, 22-32.
- 499
- 500 Allen, W. R., & Sheppard, P. M. (1971). Copper Tolerance in Some Californian  
501 Populations of the Monkey Flower, *Mimulus guttatus*. *Proc. R. Soc. B.*, 177(1047),  
502 177–196.
- 503
- 504 Antonovics, J., Bradshaw, A. D., & Turner, R. G. (1971). Heavy metal tolerance in  
505 plants. *Adv. Ecol. Res.*, 7:1–85.
- 506
- 507 Aubury, L. E. (1905). The copper resources of California (No. 23). WW Shannon,  
508 Superintendent State Print.
- 509
- 510 Barton, N. H. (2000). Genetic hitchhiking. *Phil. Tran. R. Soc. B.*, 355(1403), 1553-  
511 1562.
- 512
- 513 Berg, J. J., & Coop, G. (2015). A Coalescent Model for a Sweep of a Unique Standing  
514 Variant. *Genetics*. 201.
- 515
- 516 Bradshaw, A. D. (1984). The importance of evolutionary ideas in ecology and vice  
517 versa. *Evolutionary ecology*, 1-25.
- 518
- 519 Bradshaw, A. D. (1991). The Croonian Lecture, 1991. Genostasis and the limits to  
520 evolution. *Phil. Tran. R. Soc. B.*, 333(1267), 289–305.
- 521
- 522 Brenchley, W. E. (1958). The Park Grass Plots at Rothamsted 1856-1949. Rep.  
523 Rothamsted Exp. Stn.
- 524
- 525 Colosimo, P. F., Hosemann, K. E., Balabhadra, S., Villarreal, G., Dickson, M., Grimwood,  
526 J., et al. (2005). Widespread parallel evolution in sticklebacks by repeated fixation of  
527 Ectodysplasin alleles. *Science*, 307(5717), 1928–1933.
- 528
- 529 Endler, J. A. (1977). *Geographic Variation, Speciation and Clines* (p. 268). Princeton  
530 University Press.
- 531
- 532 Grennan, A. K. (2009). Identification of genes involved in metal transport in plants.  
533 *Plant Physiology*, 149(4), 1623–4.
- 534

- 535 Hanikenne, M., Talke, I. N., Haydon, M. J., Lanz, C., Nolte, A., Motte, P., et. al. (2008).  
536 Evolution of metal hyperaccumulation required cis-regulatory changes and  
537 triplication of HMA4. *Nature*, 453(7193), 391–395.  
538
- 539 Heliconius Genome Consortium. (2012). Butterfly genome reveals promiscuous  
540 exchange of mimicry adaptations among species. *Nature*, 487(7405), 94-98.  
541
- 542 Innan, H., & Kim, Y. (2004). Pattern of polymorphism after strong artificial selection  
543 in a domestication event. *Proc. Nat. Acad. Sci.*101(29), 10667-10672.  
544
- 545 Innan, H., & Kim, Y. (2008). Detecting local adaptation using the joint sampling of  
546 polymorphism data in the parental and derived populations. *Genetics*, 179(3), 1713-  
547 1720.  
548
- 549 Joron, M., & Mallet, J. L. (1998). Diversity in mimicry: paradox or paradigm? *Trends*  
550 *Eco. & Evol*, 13(11), 461-466.  
551
- 552 Karasov, T., Messer, P. W., & Petrov, D. A. (2010). Evidence that Adaptation in  
553 *Drosophila* Is Not Limited by Mutation at Single Sites. *PLoS Genetics*, 6(6),  
554 e1000924.  
555
- 556 Kruckeberg, Arthur R. (1951) Intraspecific variability in the response of certain  
557 native plant species to serpentine soil. *Amer. Jour. Botany* (1951): 408-419  
558
- 559 Macnair, M. R. (1987). Heavy metal tolerance in plants: A model evolutionary  
560 system. *Trends Eco. & Evol*, 2(12), 354–359.  
561
- 562 Macnair, M. R., Smith, S. E., & Cumbes, Q. J. (1993). Heritability and distribution of  
563 variation in degree of copper tolerance in *Mimulus guttatus* at Copperopolis,  
564 California. *Heredity*, 71(5), 445–455.  
565
- 566 Maynard-Smith, J., & Haigh, J. (1974). The hitch-hiking effect of a favourable gene.  
567 *Genetics Research*, 23(01), 23–35.  
568
- 569 Messer, P. W., & Petrov, D. A. (2013). Population genomics of rapid adaptation by  
570 soft selective sweeps. *Trends Eco. & Evol*, 28(11), 659–69.  
571
- 572 Prezeworski, M., Coop, G., & Wall, J. D. (2005). The signature of positive selection on  
573 standing genetic variation. *Evolution*, 59(11), 2312-2323.  
574
- 575 Roesti, M., Gavrillets, S., Hendry, A. P., Salzburger, W., & Berner, D. (2014). The  
576 genomic signature of parallel adaptation from shared genetic variation. *Molecular*  
577 *Ecology*, 23(16), 3944-3956.  
578
- 579 Schluter, D. (2000). *The Ecology of Adaptive Radiation*. Oxford, England: Oxford  
580 University Press.

581

582 Symeonidis, L., McNeilly, T., & Bradshaw, A. D. (1985). Differential tolerance of three  
583 cultivars of *Agrostis capillaries* l. to cadmium, copper, lead, nickel and zinc. *New*  
584 *Phytologist*, 101(2), 309–315.

585

586 Tishkoff, S. A., Reed, F. A., Ranciaro, A., Voight, B. F., Babbitt, C. C., Silverman, J. S., ...  
587 Deloukas, P. (2007). Convergent adaptation of human lactase persistence in Africa  
588 and Europe. *Nature Genetics*, 39(1), 31–40.

589

590 Turner, R. G. (1969). Heavy metal tolerance in plants. Vol. 9, 399-410. Blackwell  
591 Oxford.

592

593 Walley, K. A., Khan, M. S. I., & Bradshaw, A. D. (1974). The potential for evolution of  
594 heavy metal tolerance in plants. I. *Heredity*, 32, 309-319.

595

596 Wright, K. M., Lloyd, D., Lowry, D. B., Macnair, M. R., & Willis, J. H. (2013). Indirect  
597 evolution of hybrid lethality due to linkage with selected locus in *Mimulus guttatus*.  
598 *PLoS Biol*, 11(2), e1001497.

**1A.**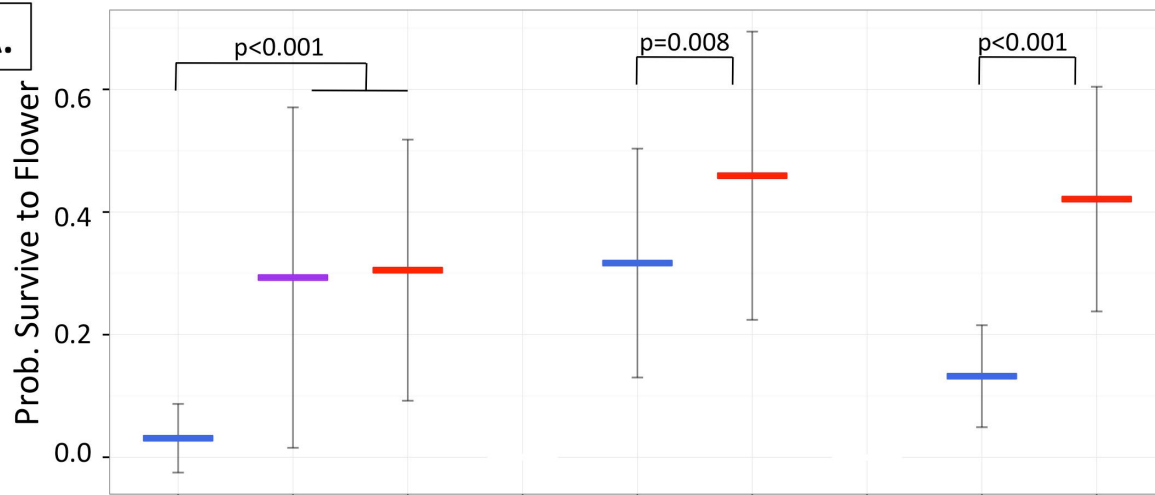**1B.**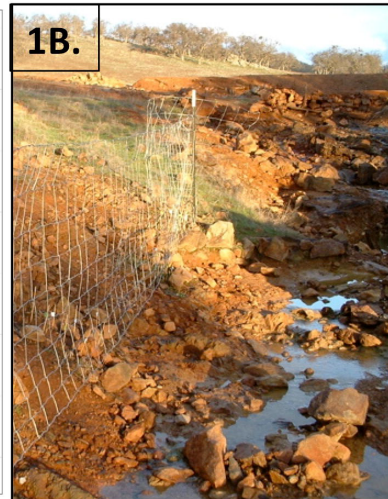**1C.**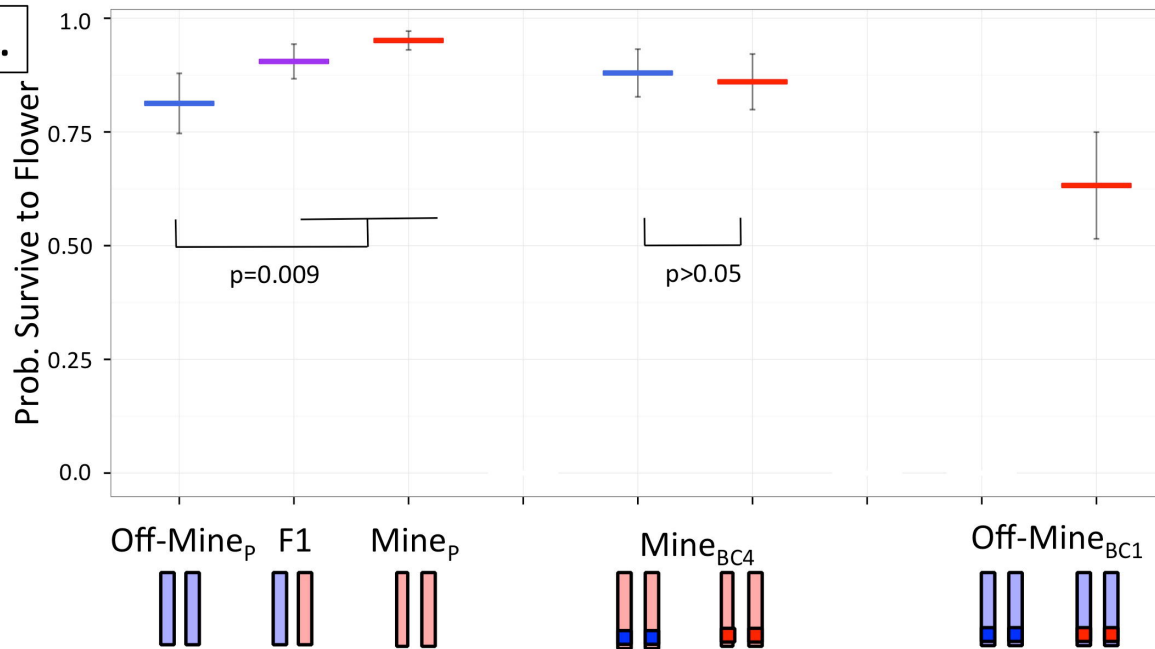**1D.**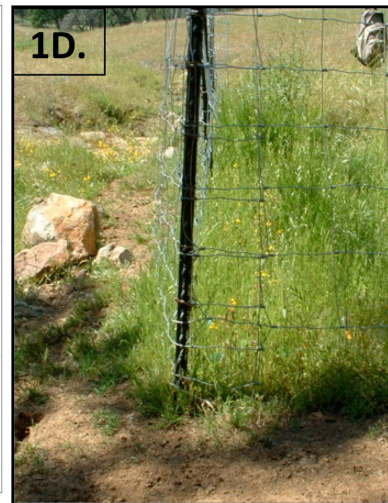

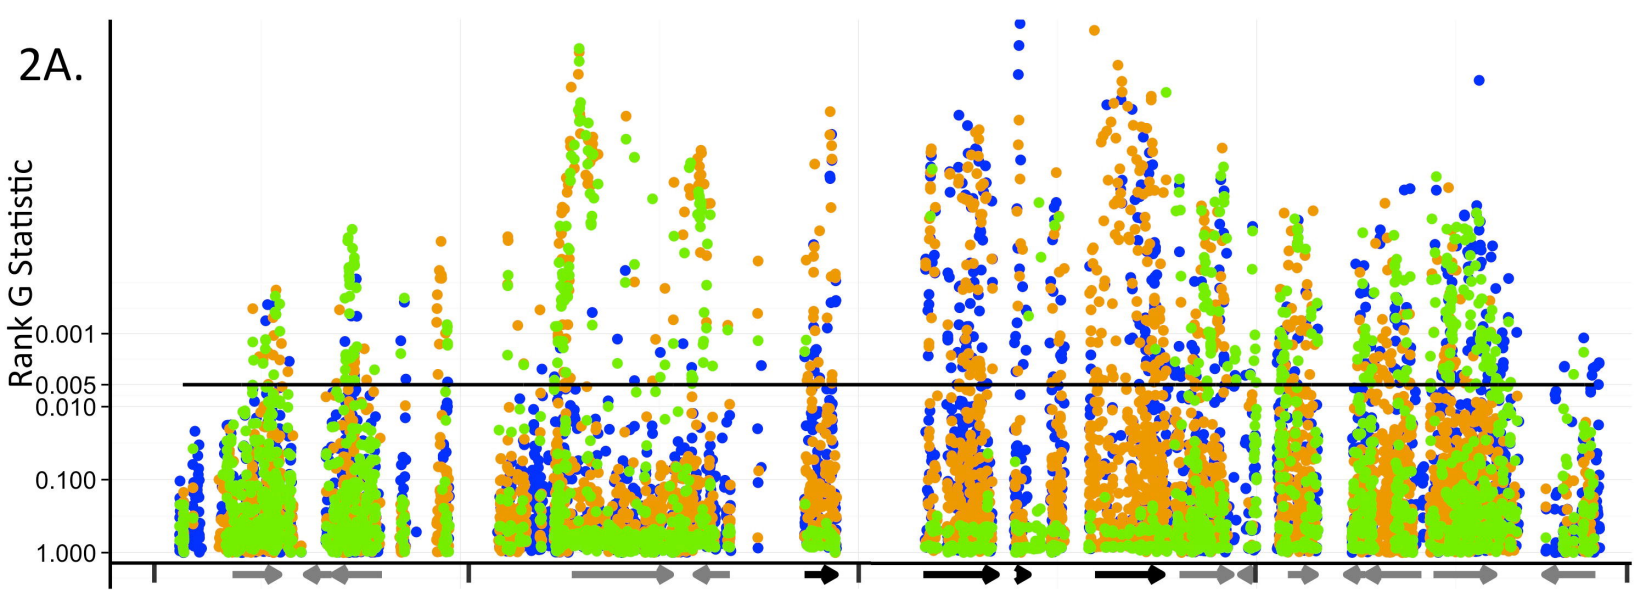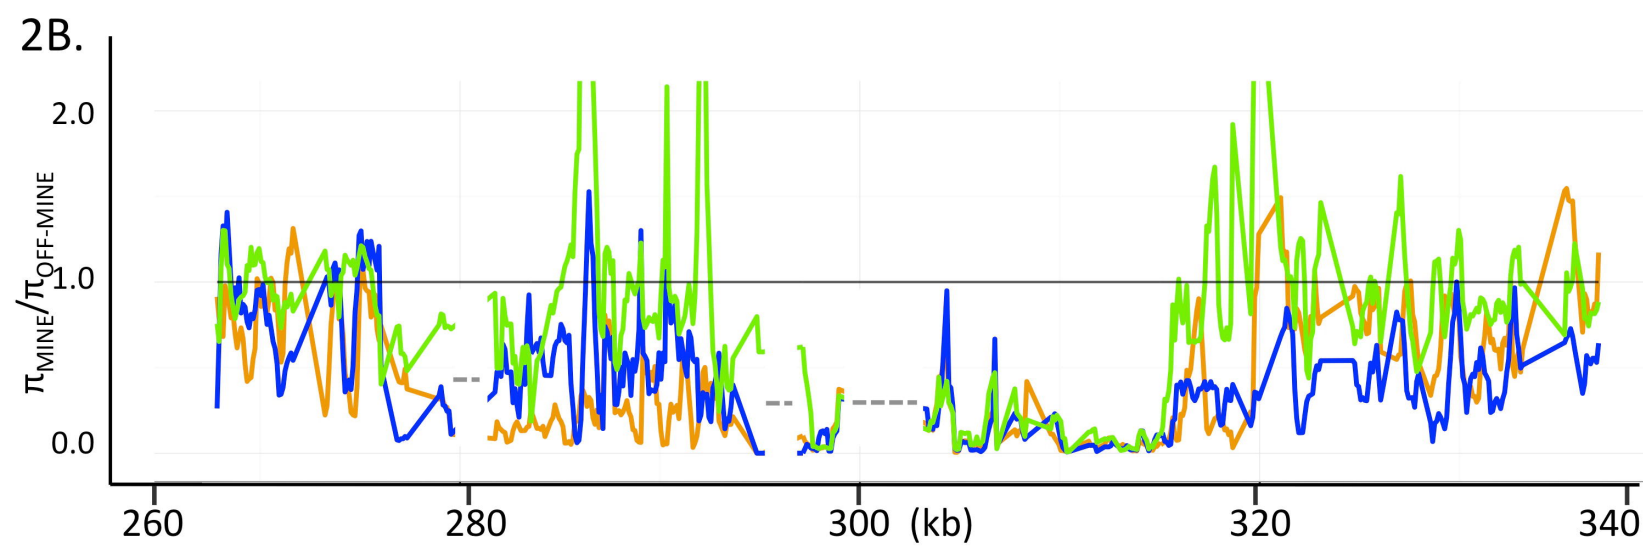



S Figure 1

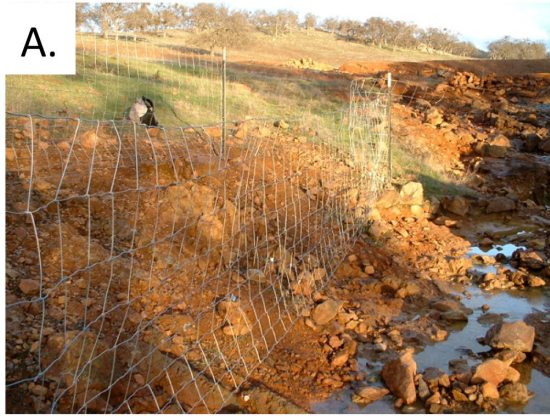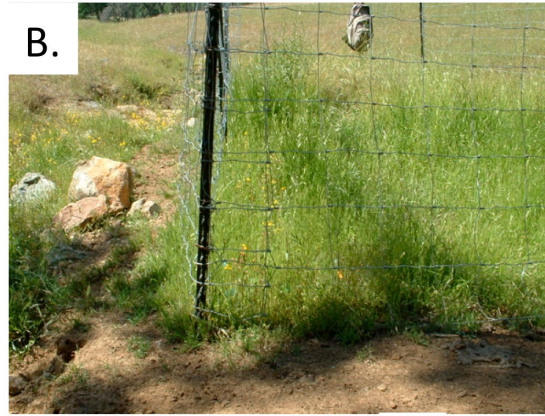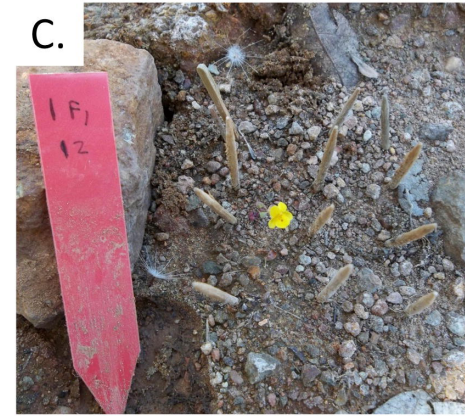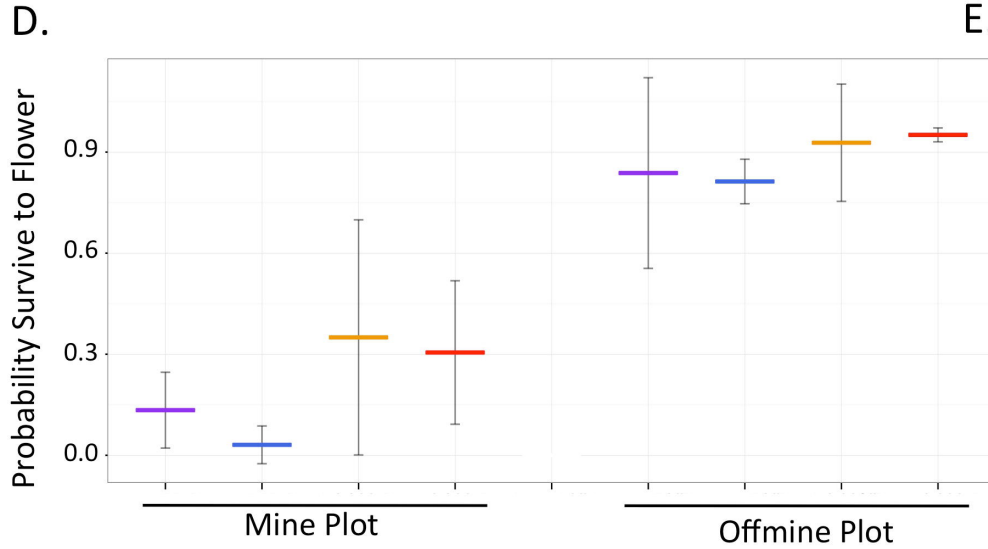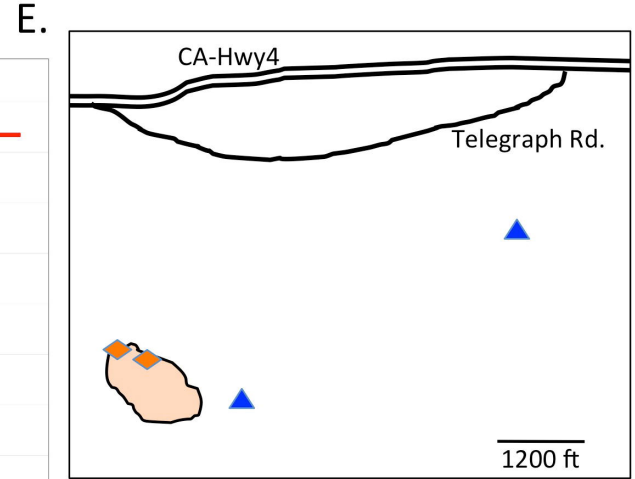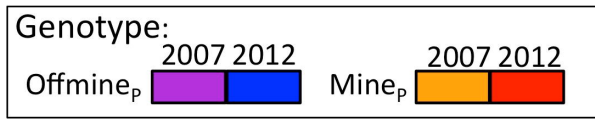

S Figure 2

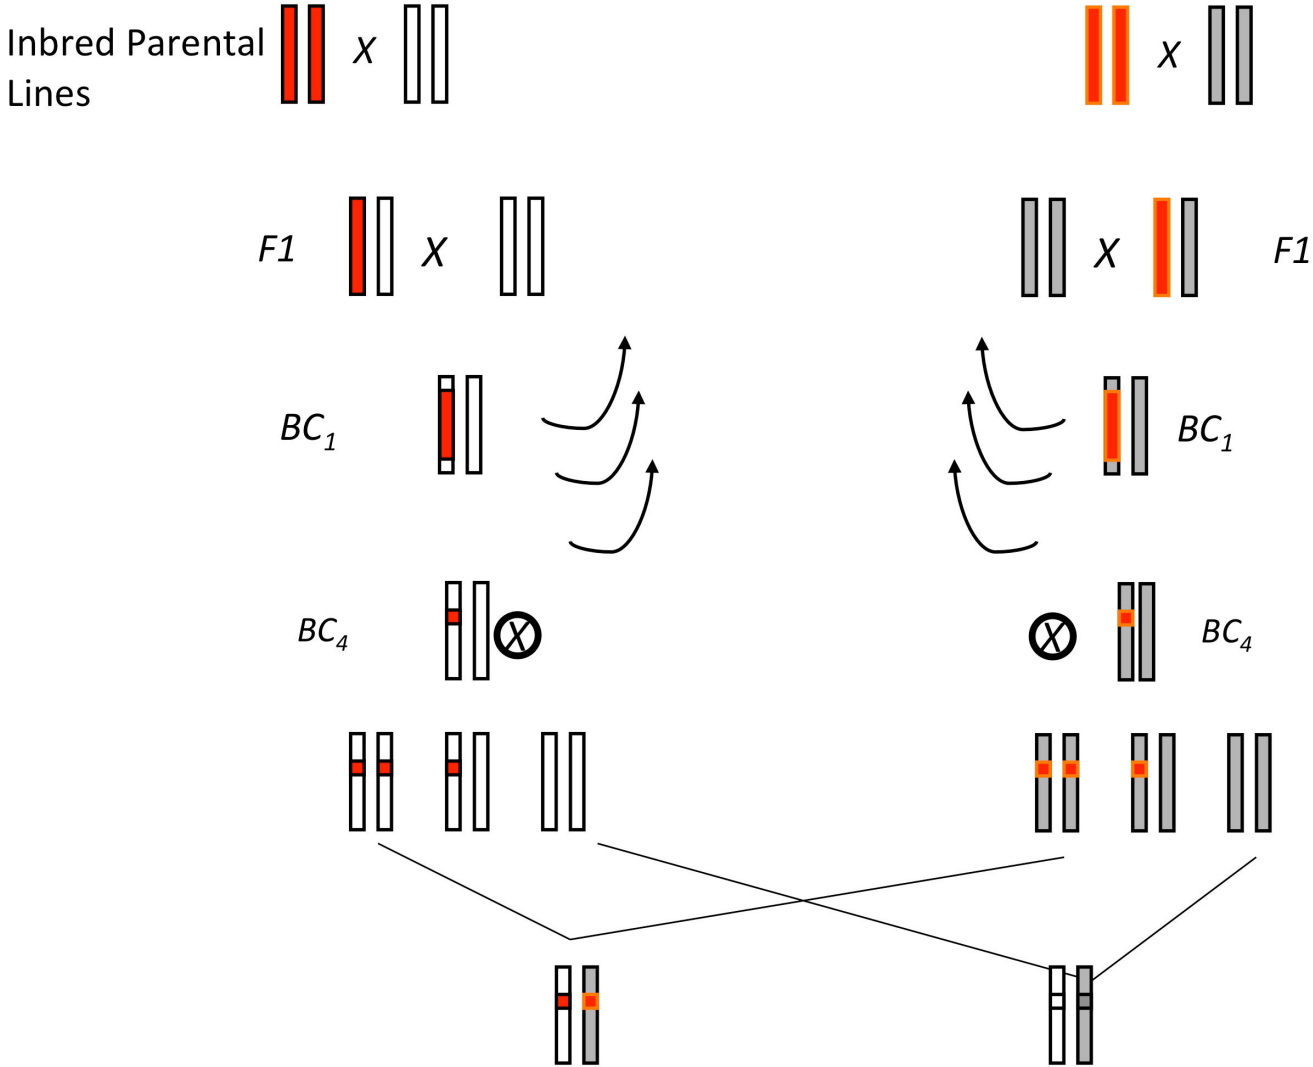

S Figure 3

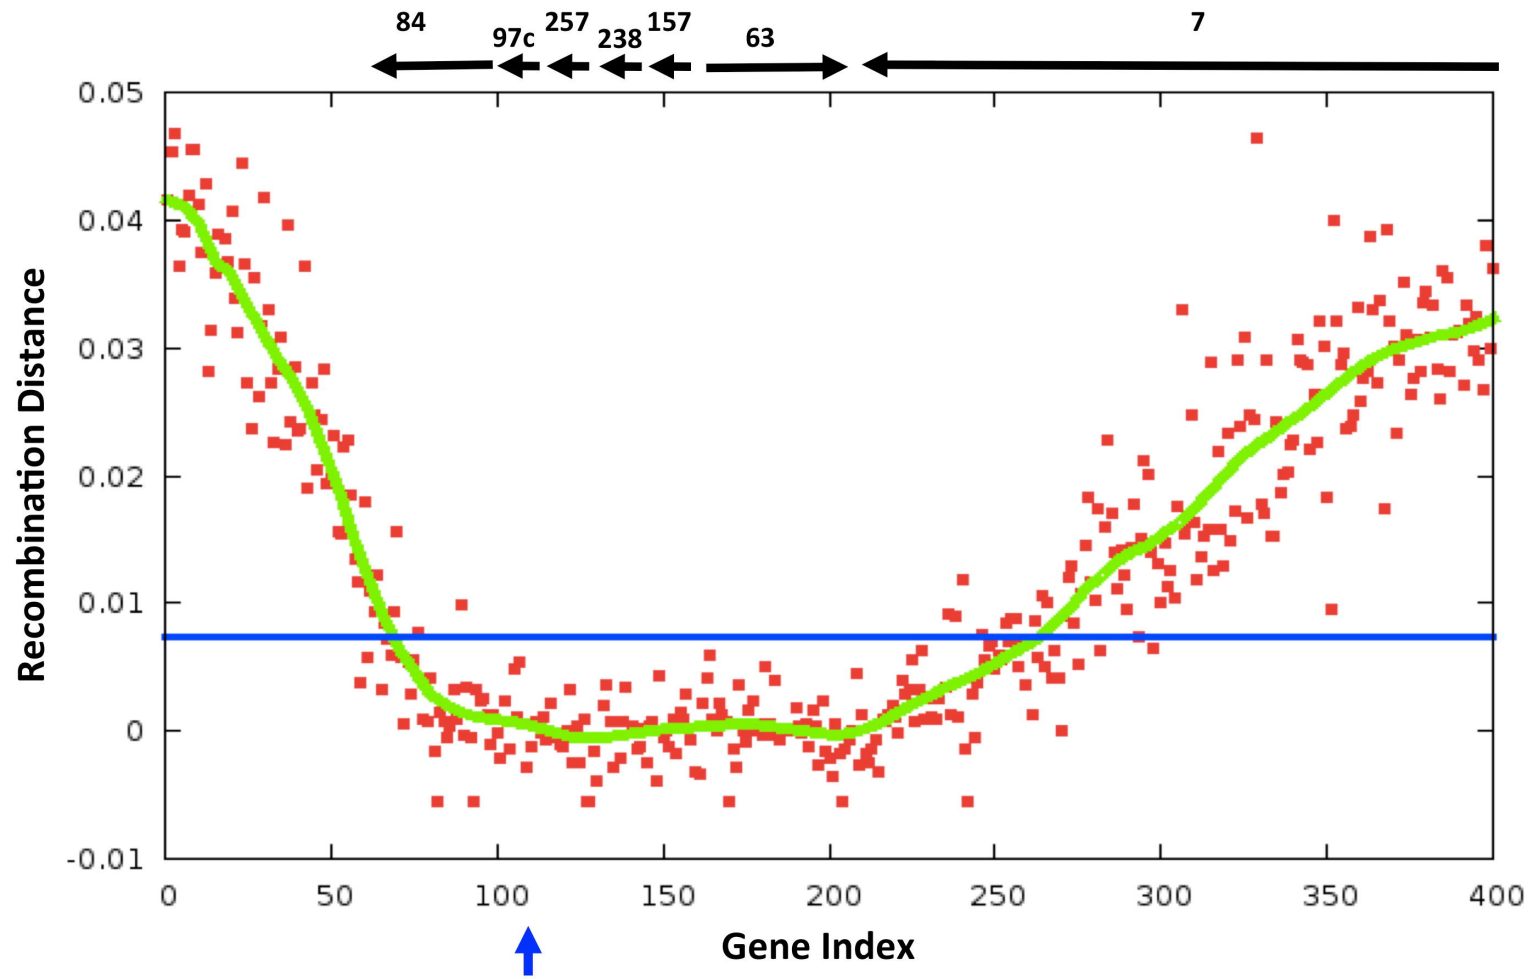

# S Figure 4

A.

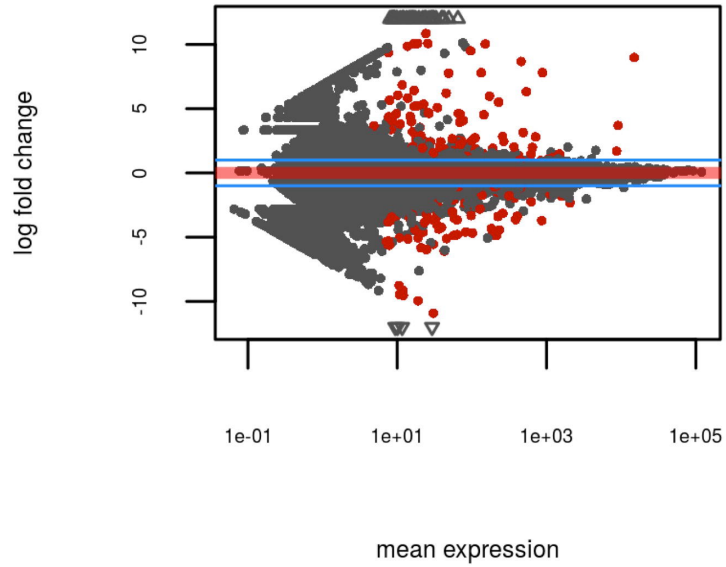

B.

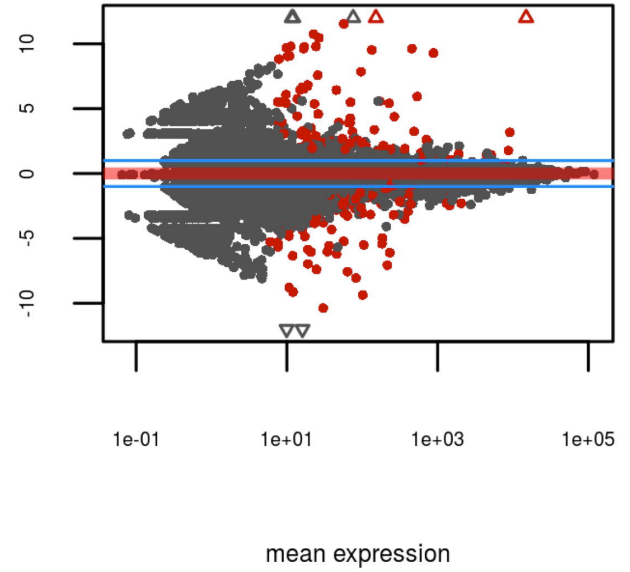

S Figure 5

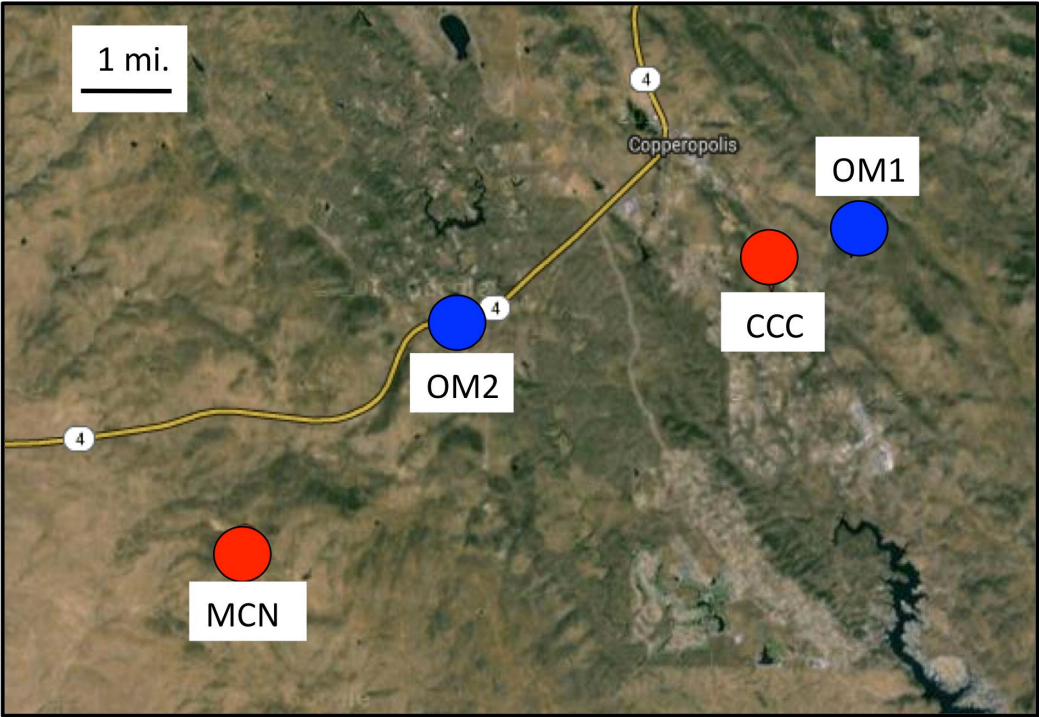



S Figure 6

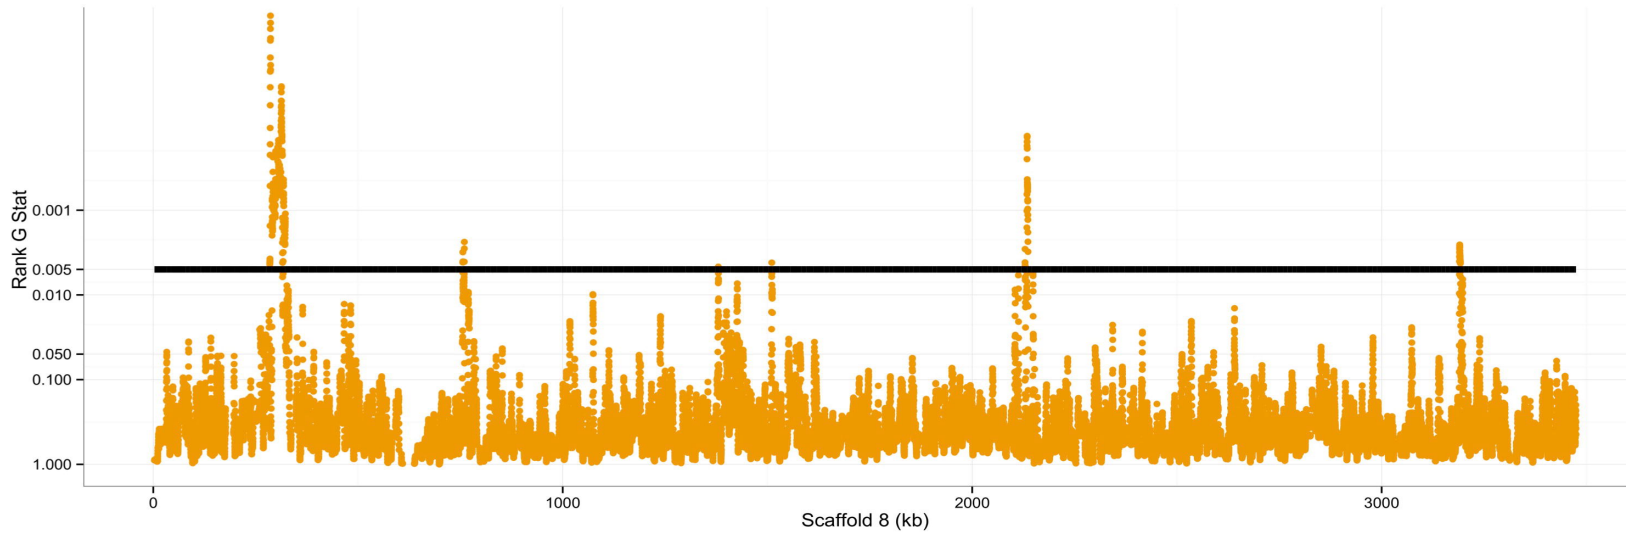

S. Figure 7

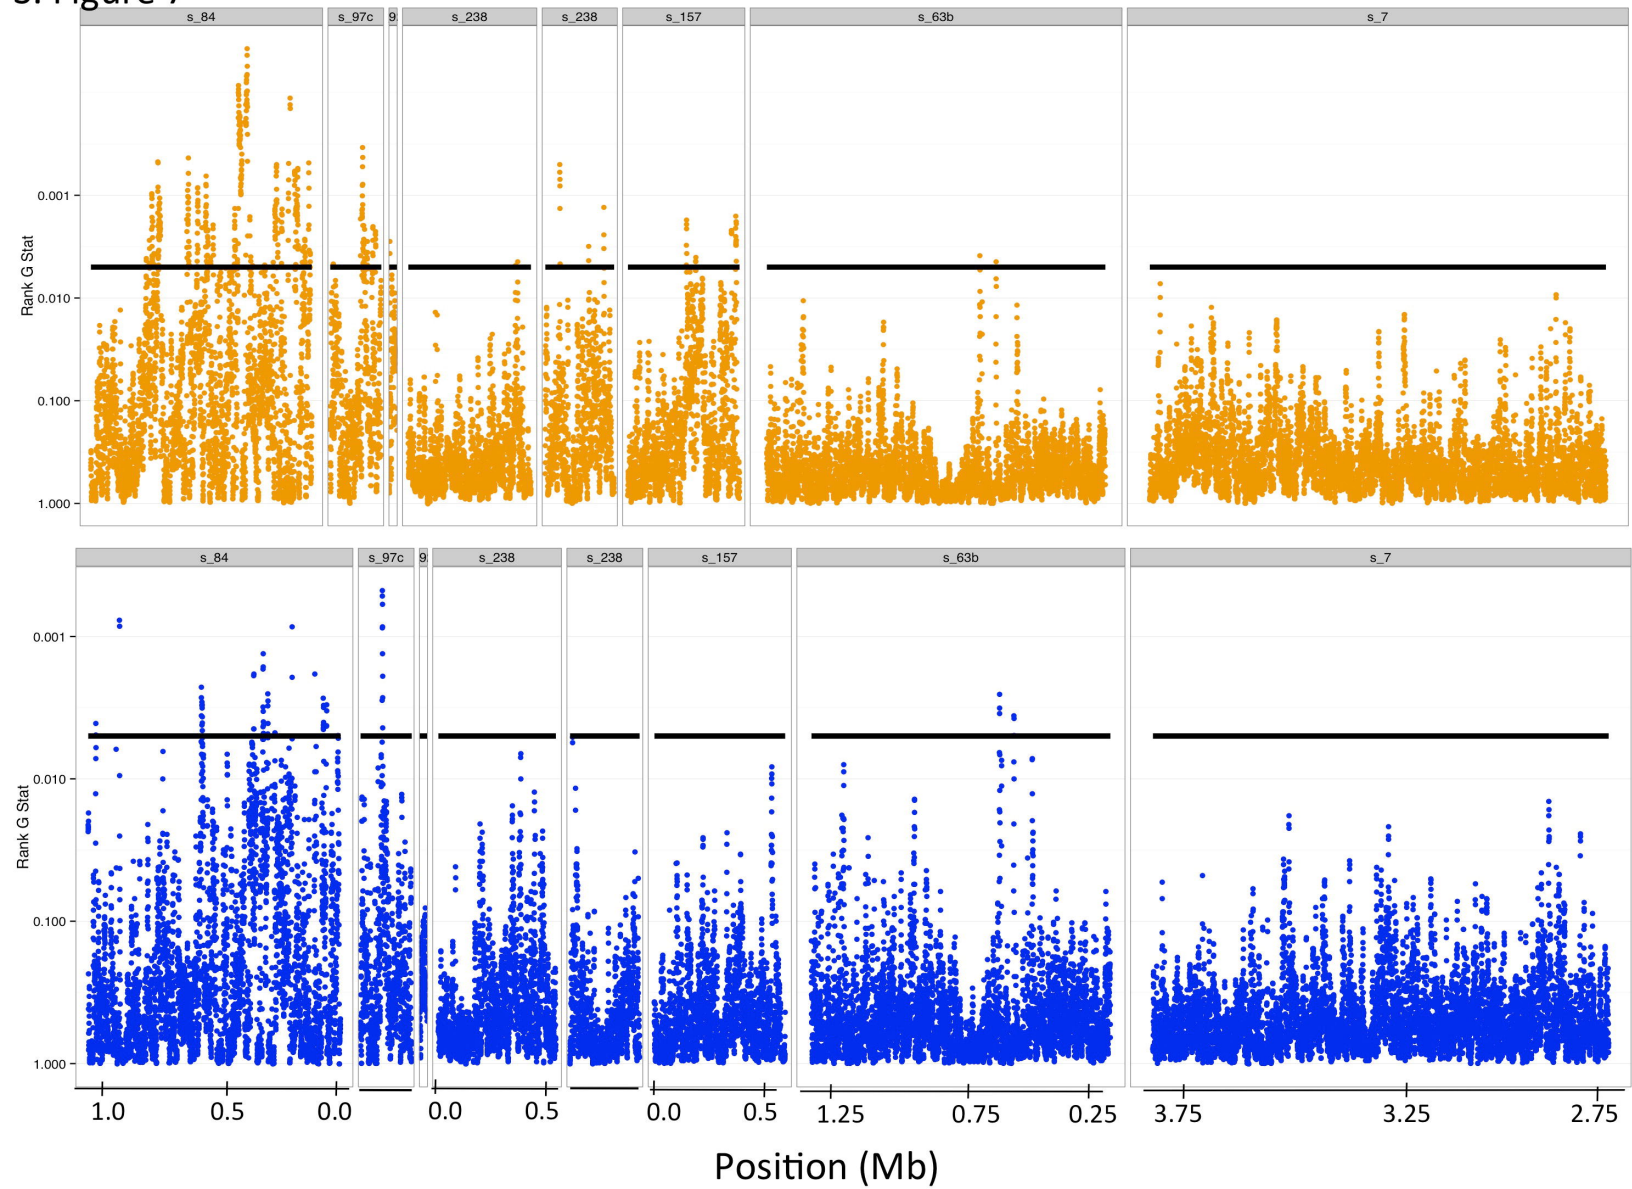

# S. Figure 8

## A.

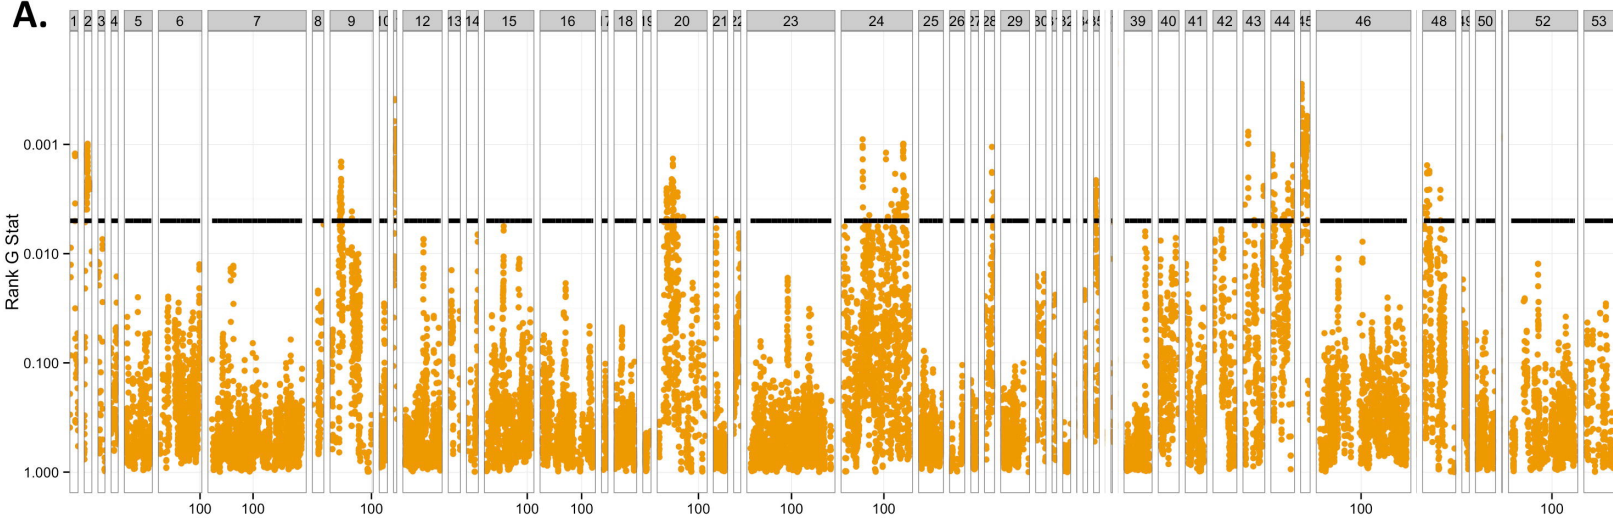

## B.

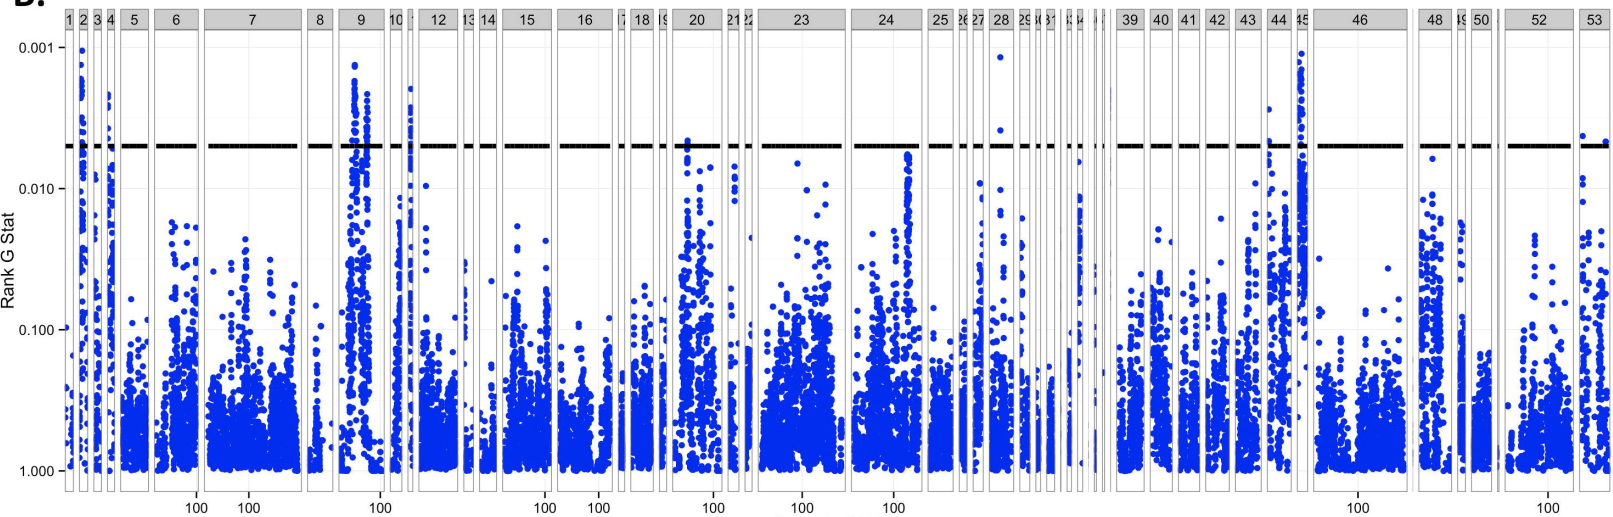

S Figure 9

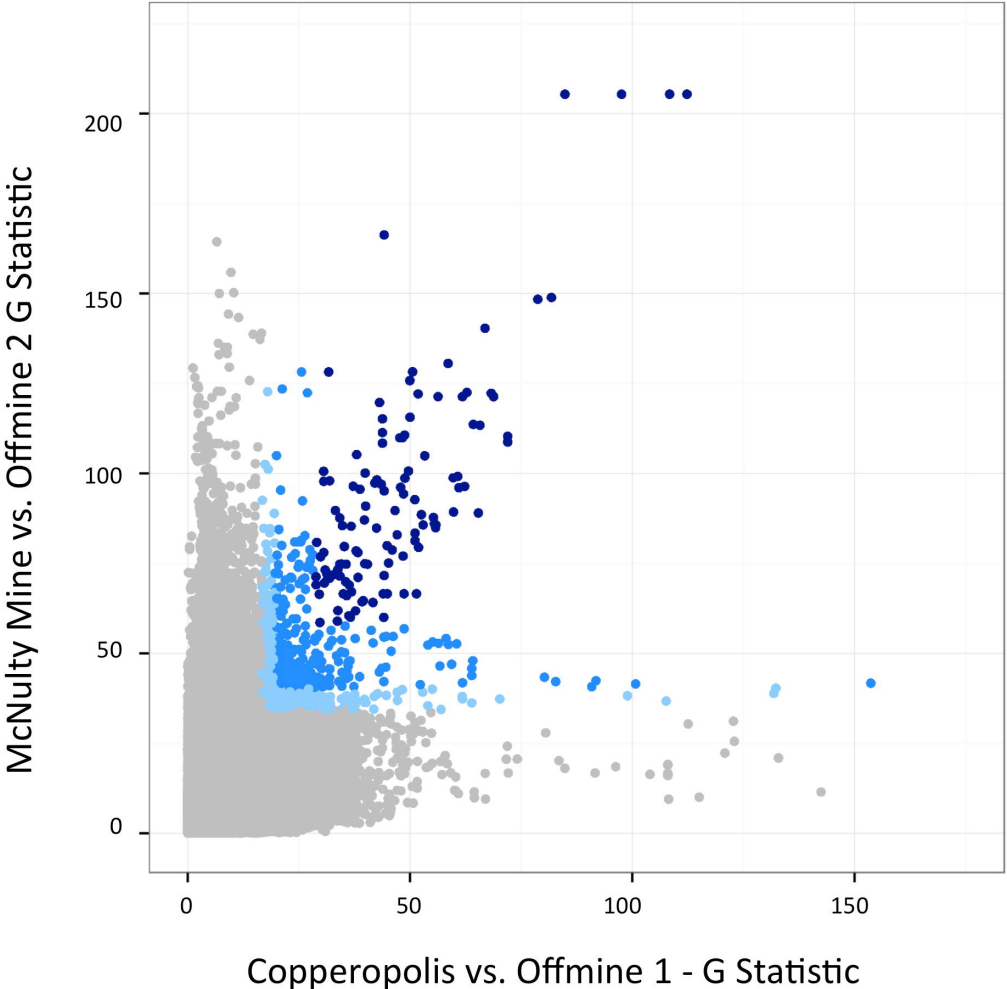

**A.** S Figure 10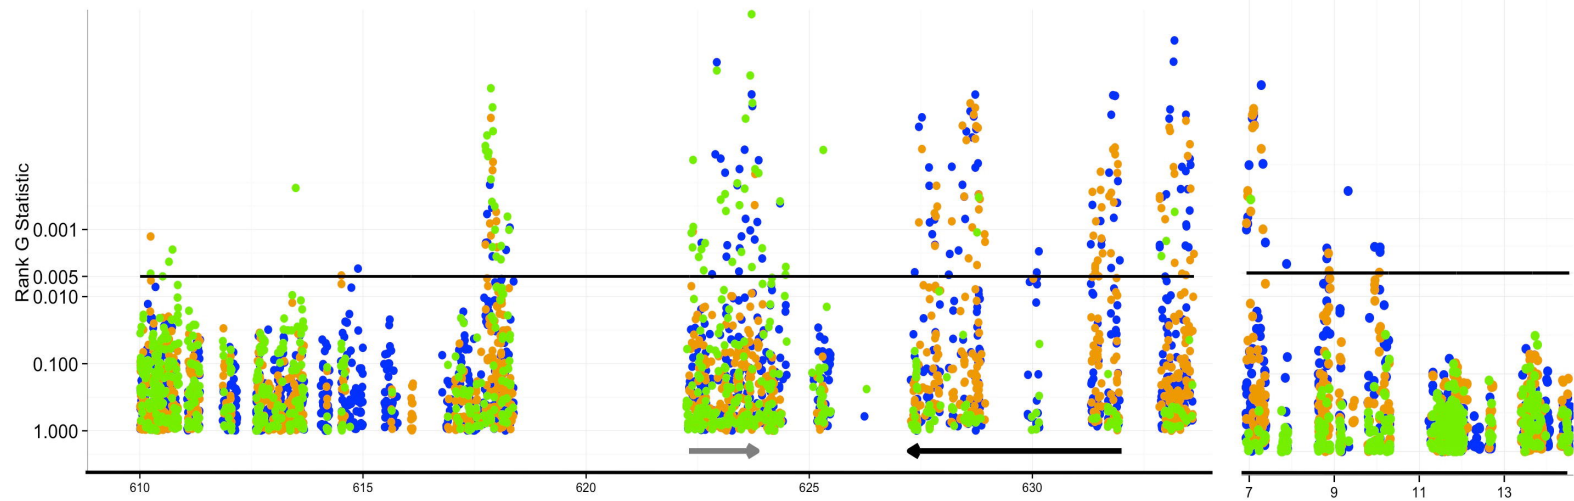**B.**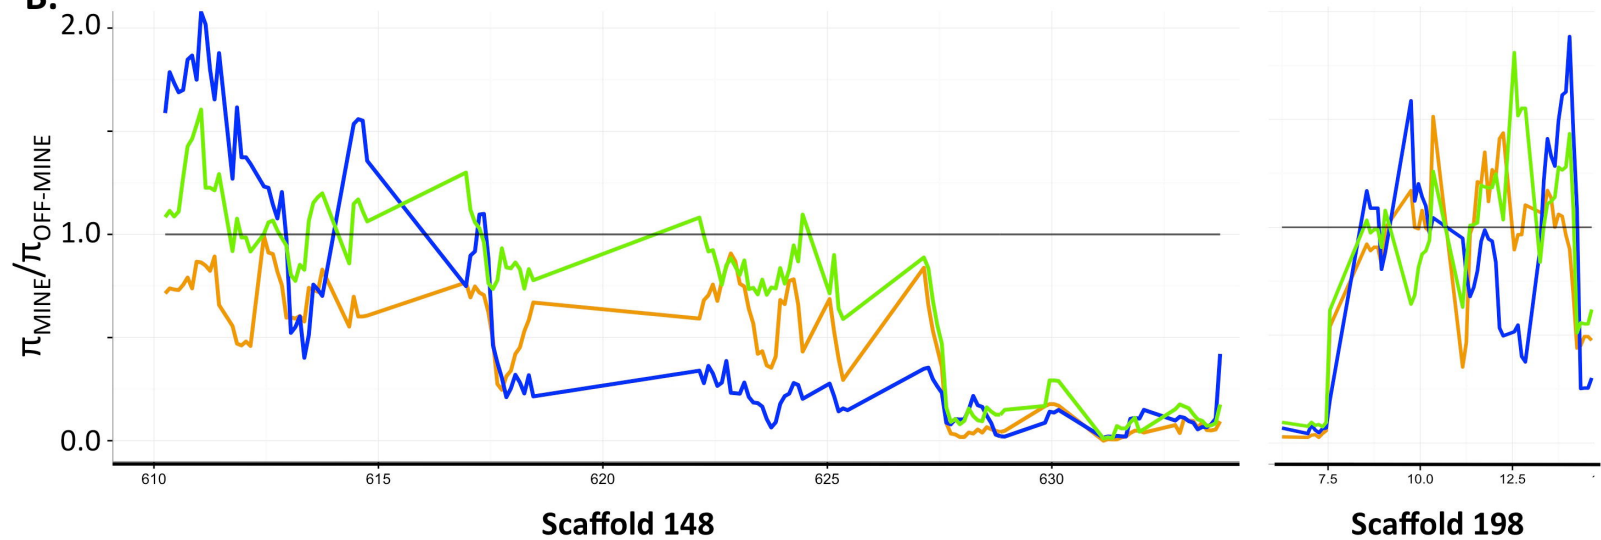



S Figure 11

**A.**

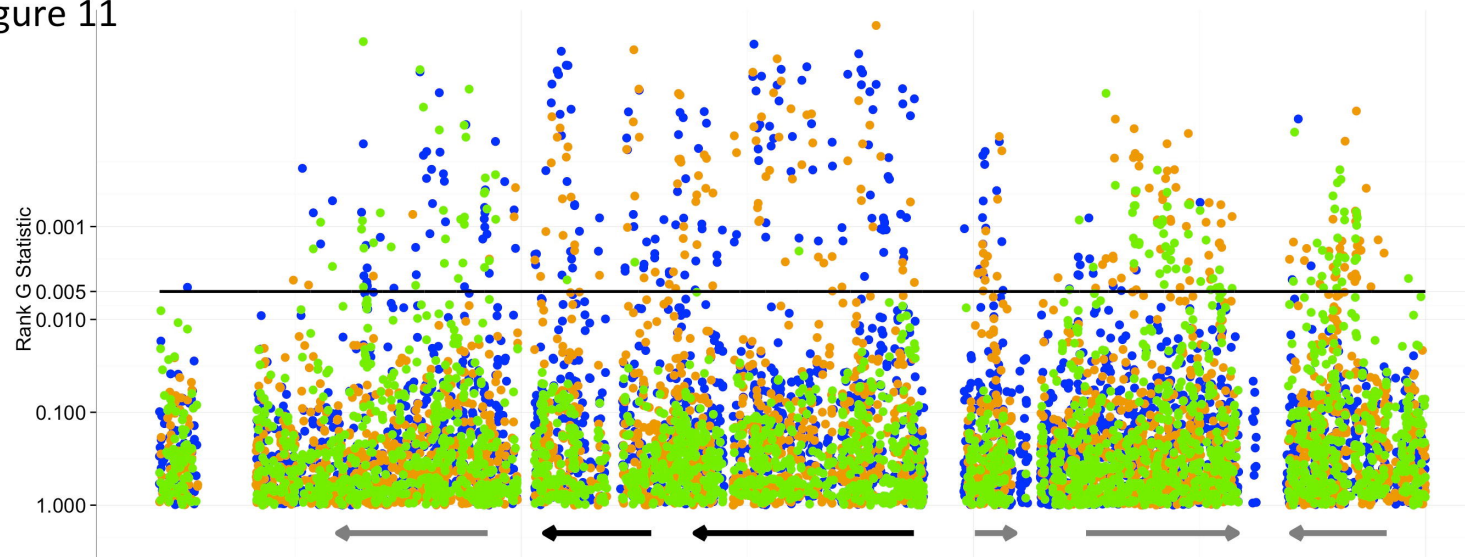

**B.**

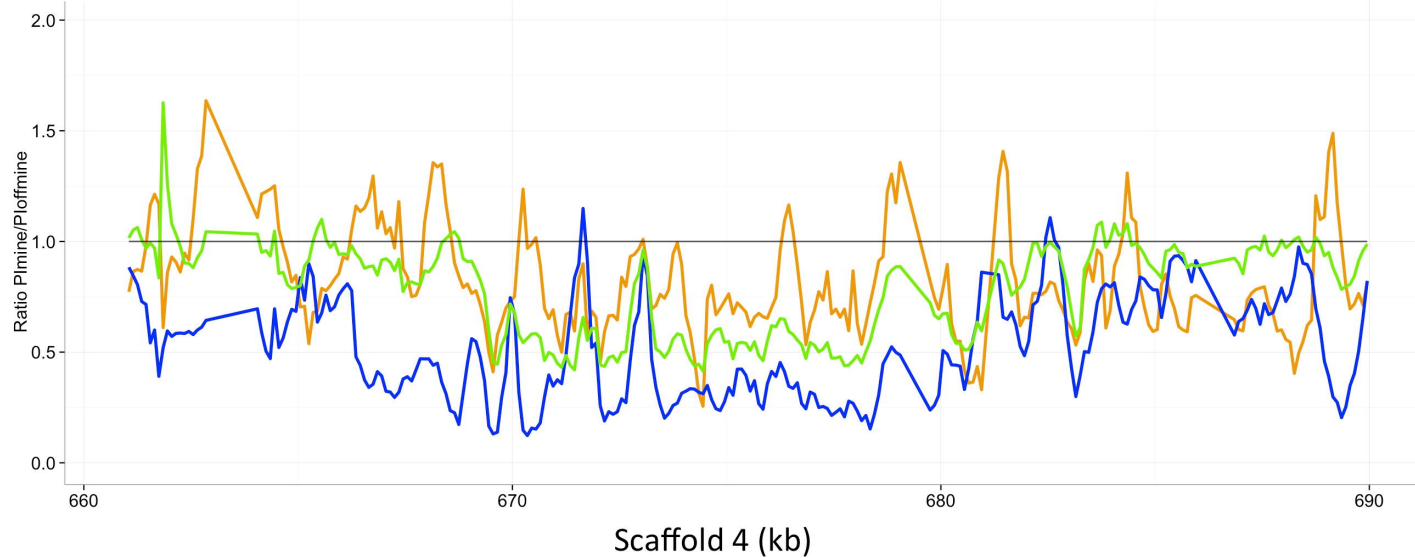



S Figure 12

**A.**

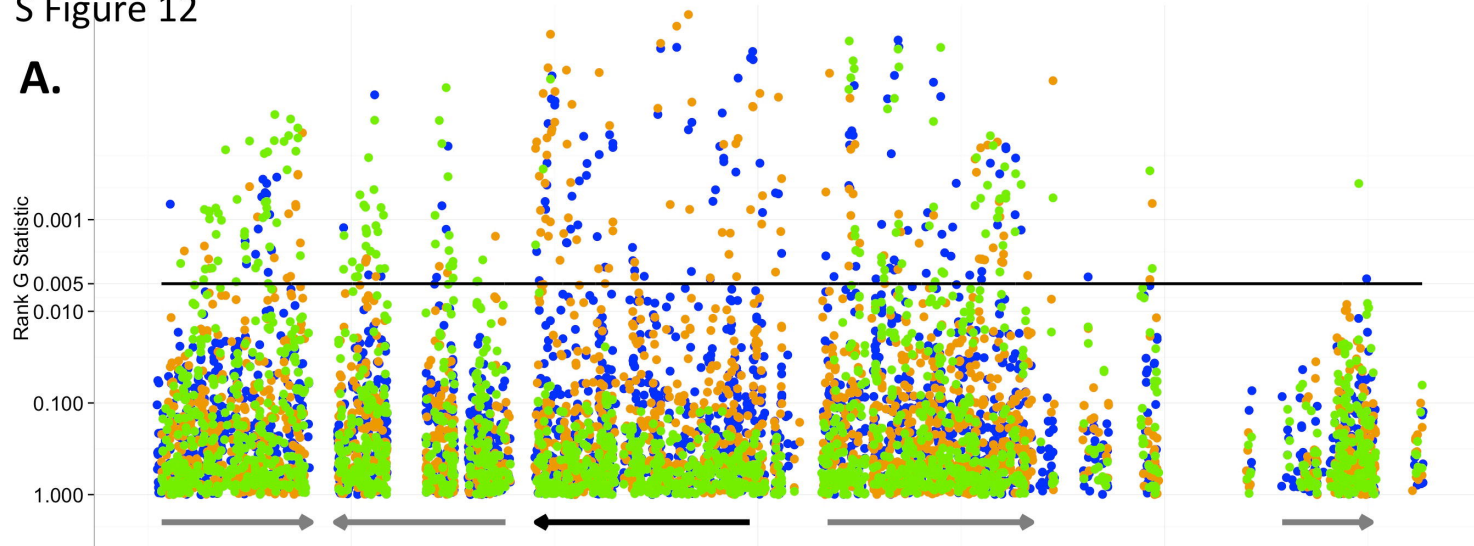

**B.**

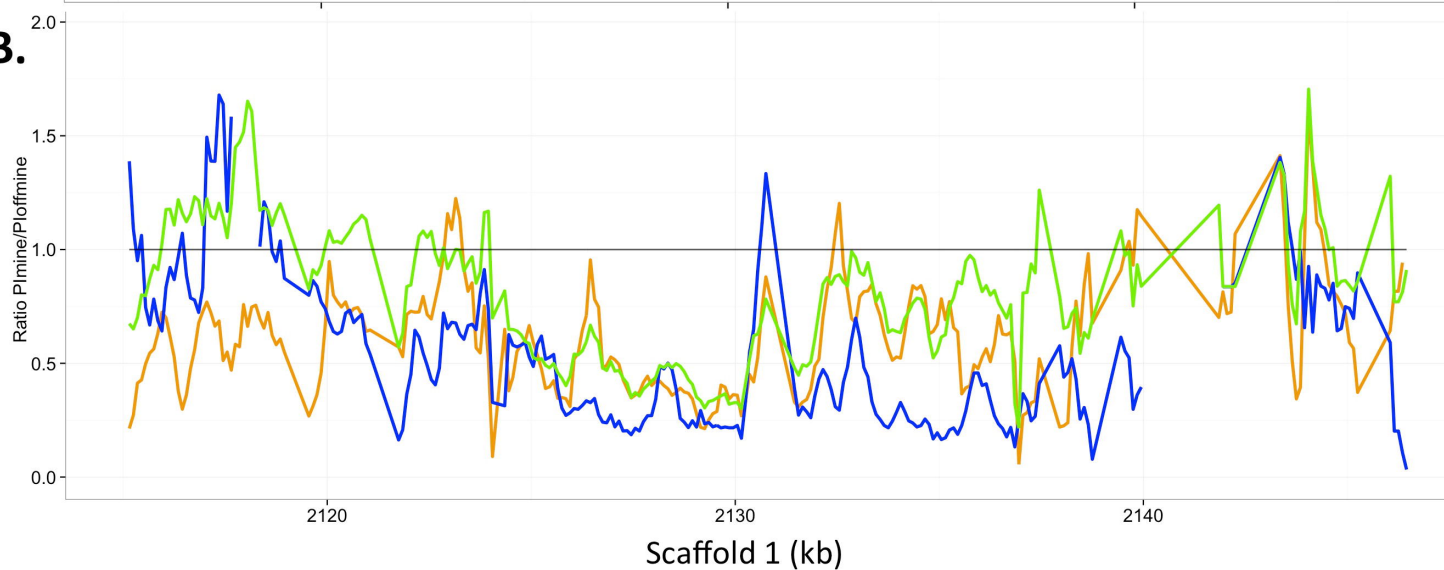

S Figure 13

**A.**

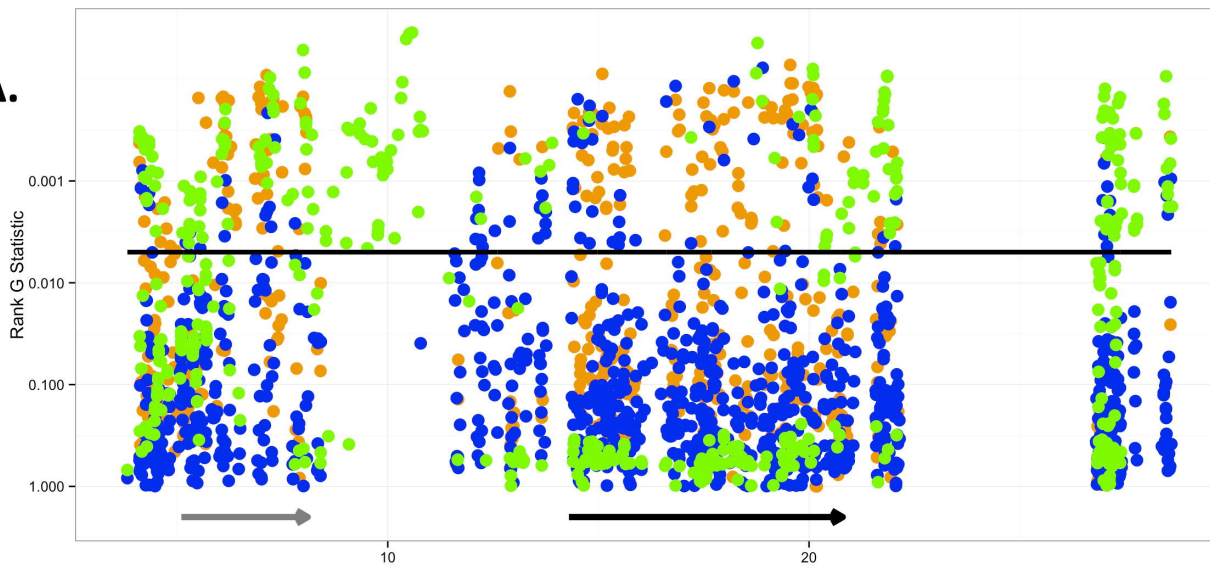

**B.**

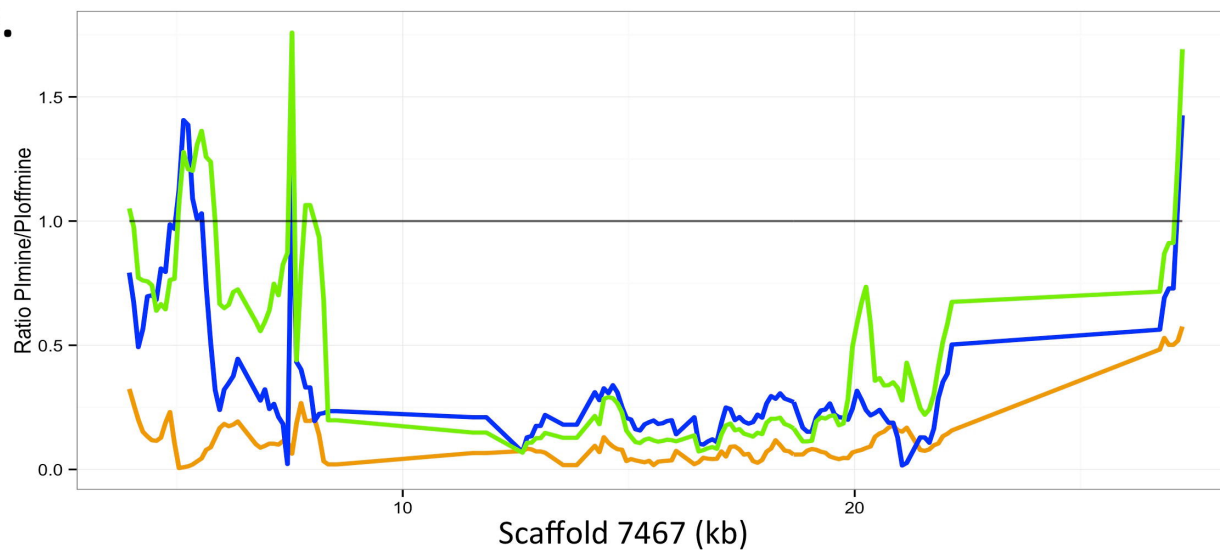

S Figure 14

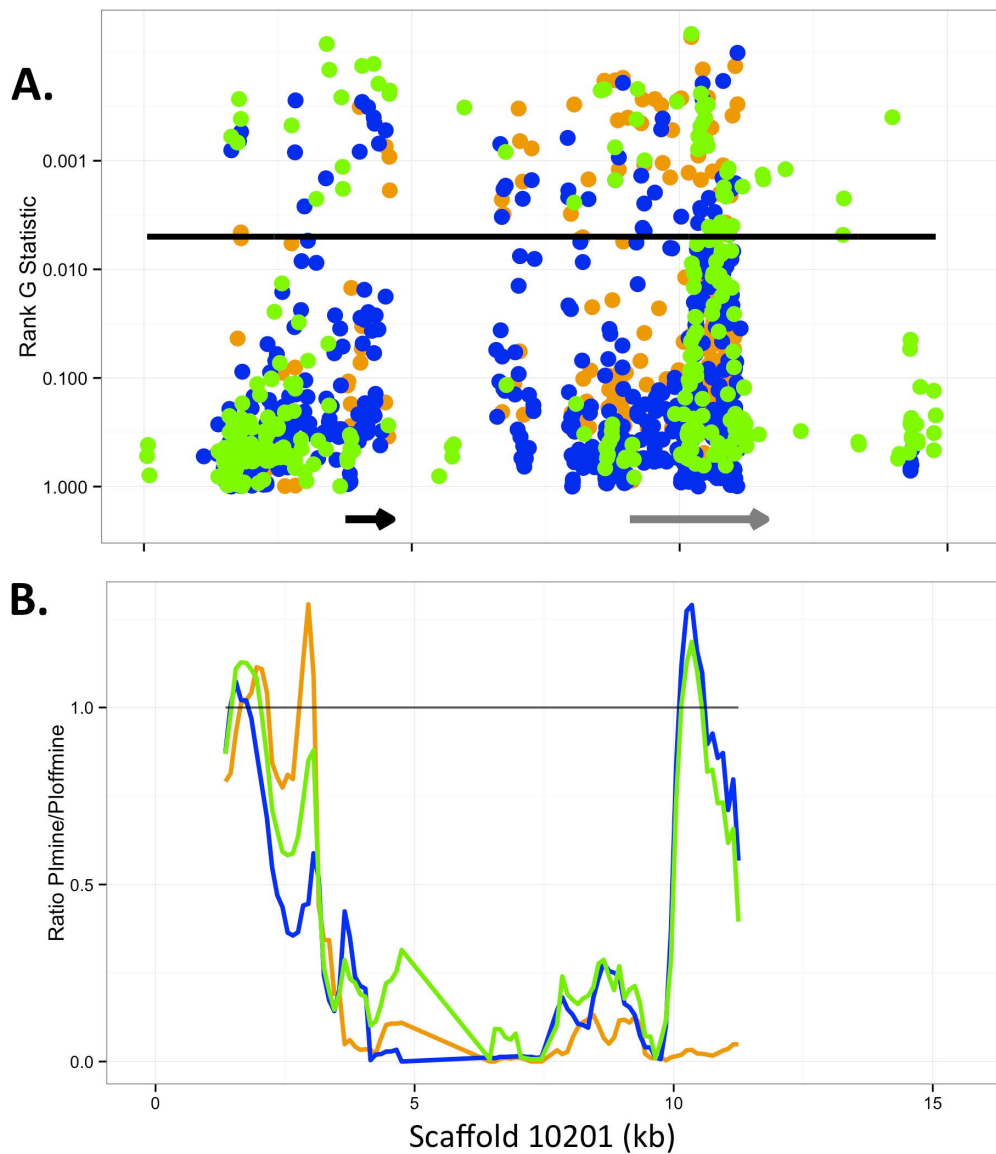

S Figure 15

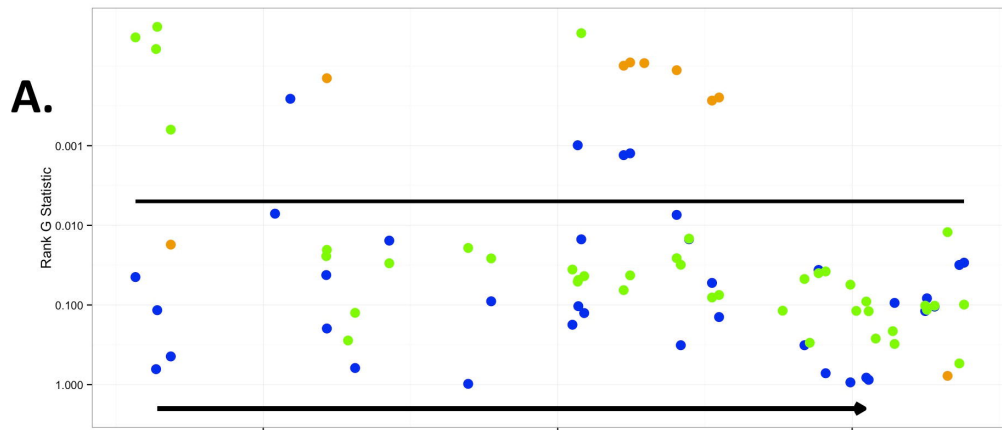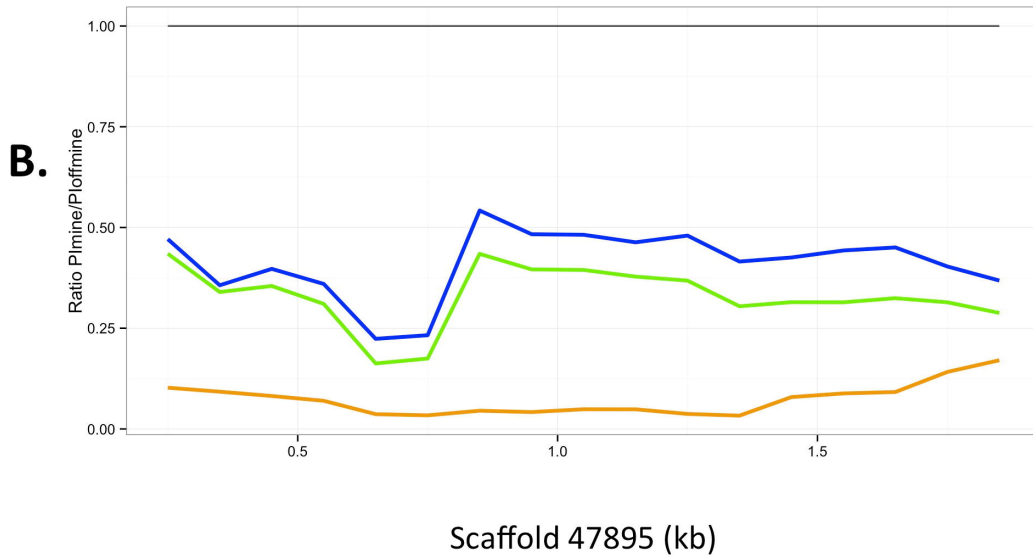

Source: https://www.biorxiv.org/content/10.1101/029900v2.full.pdf
